# Supplementary material for: S100A5 Attenuates Efficiency of Anti‐PD‐L1/PD‐1 Immunotherapy by Inhibiting CD8+ T Cell‐Mediated Anti‐Cancer Immunity in Bladder Carcinoma
Source: PubMed Central journal article supplement (PMC10477882; doi:10.1002/advs.202300110), 2023-07-06
Supplement: ADVS-10-2300110-s004.pdf [file ADVS-10-2300110-s004.pdf]

## Supporting Information

for *Adv. Sci.*, DOI 10.1002/adv.202300110

S100A5 Attenuates Efficiency of Anti-PD-L1/PD-1 Immunotherapy by Inhibiting CD8<sup>+</sup> T Cell-Mediated Anti-Cancer Immunity in Bladder Carcinoma

*Huihuang Li, Jinbo Chen, Zhenghao Li, Minfeng Chen, Zhenyu Ou, Miao Mo, Ruizhe Wang, Shiyu Tong, Peihua Liu, Zhiyong Cai, Chunyu Zhang, Zhi Liu, Dingshan Deng, Jinhui Liu, Chunliang Cheng, Jiao Hu\* and Xiongbing Zu\**

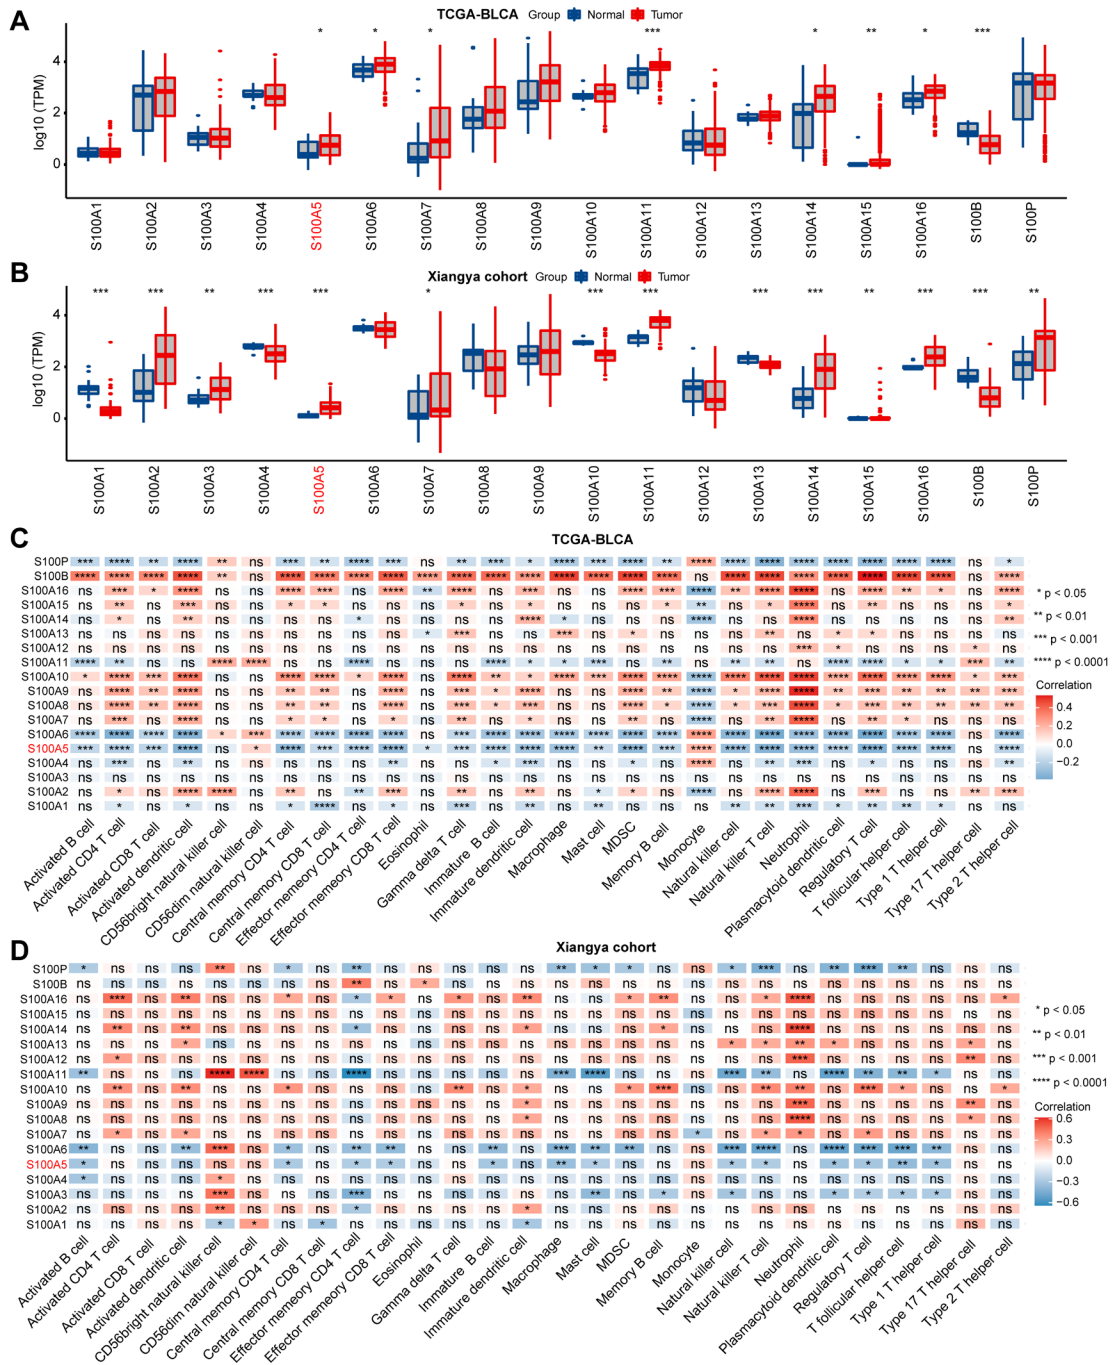

**Figure S1. The expression pattern and immunological role of multiple S100 proteins in bladder carcinoma (BLCA).** (A-B) The expression patterns of multiple S100 proteins in BLCA based on TCGA-BLCA (A) and Xiangya BLCA (B) cohorts respectively. (C-D) Correlation between multiple S100 proteins and 28 immune cells infiltration in BLCA based on TCGA-BLCA (C) and Xiangya BLCA (D) cohorts respectively. ns, not statistically significant; \* $P < 0.05$ ; \*\* $P < 0.01$ ; \*\*\* $P < 0.001$ .



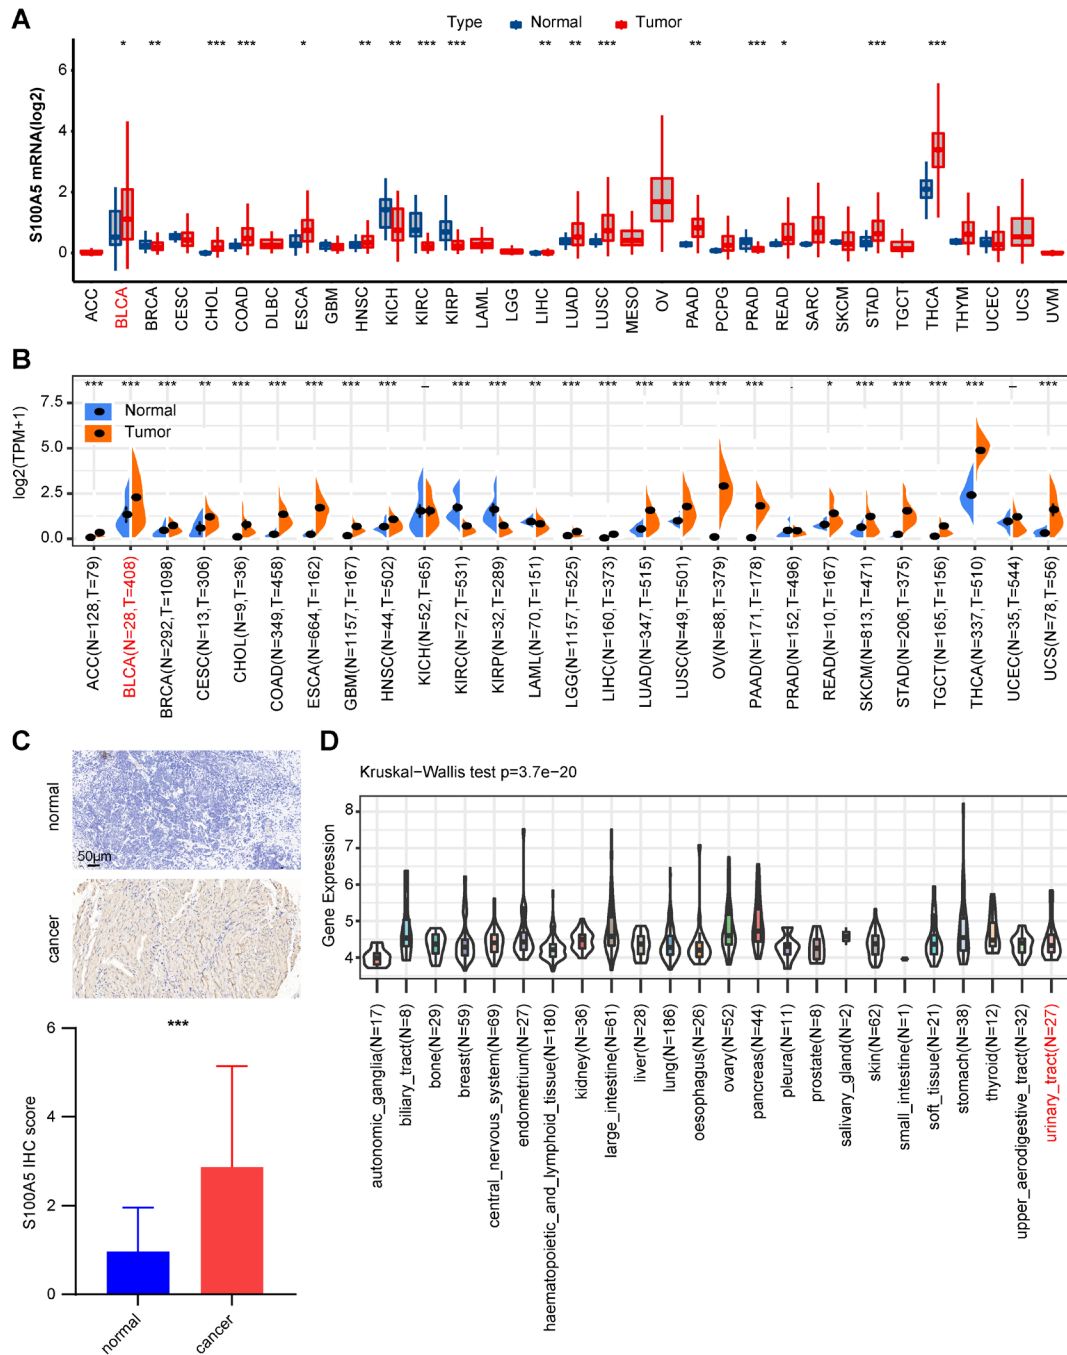

**Figure S2. The expression pattern of S100A5 in multiple carcinoma types.** (A-B) The expression patterns of S100A5 in TCGA (A) and TCGA combined with GTEx databases (B) across 33 types of carcinomas. (C) Representative images and boxplot of S100A5 IHC score in normal and tumor tissues. (D) The expression patterns of S100A5 in multiple kinds of normal tissues. \* $P < 0.05$ ; \*\* $P < 0.01$ ; \*\*\* $P < 0.001$ .

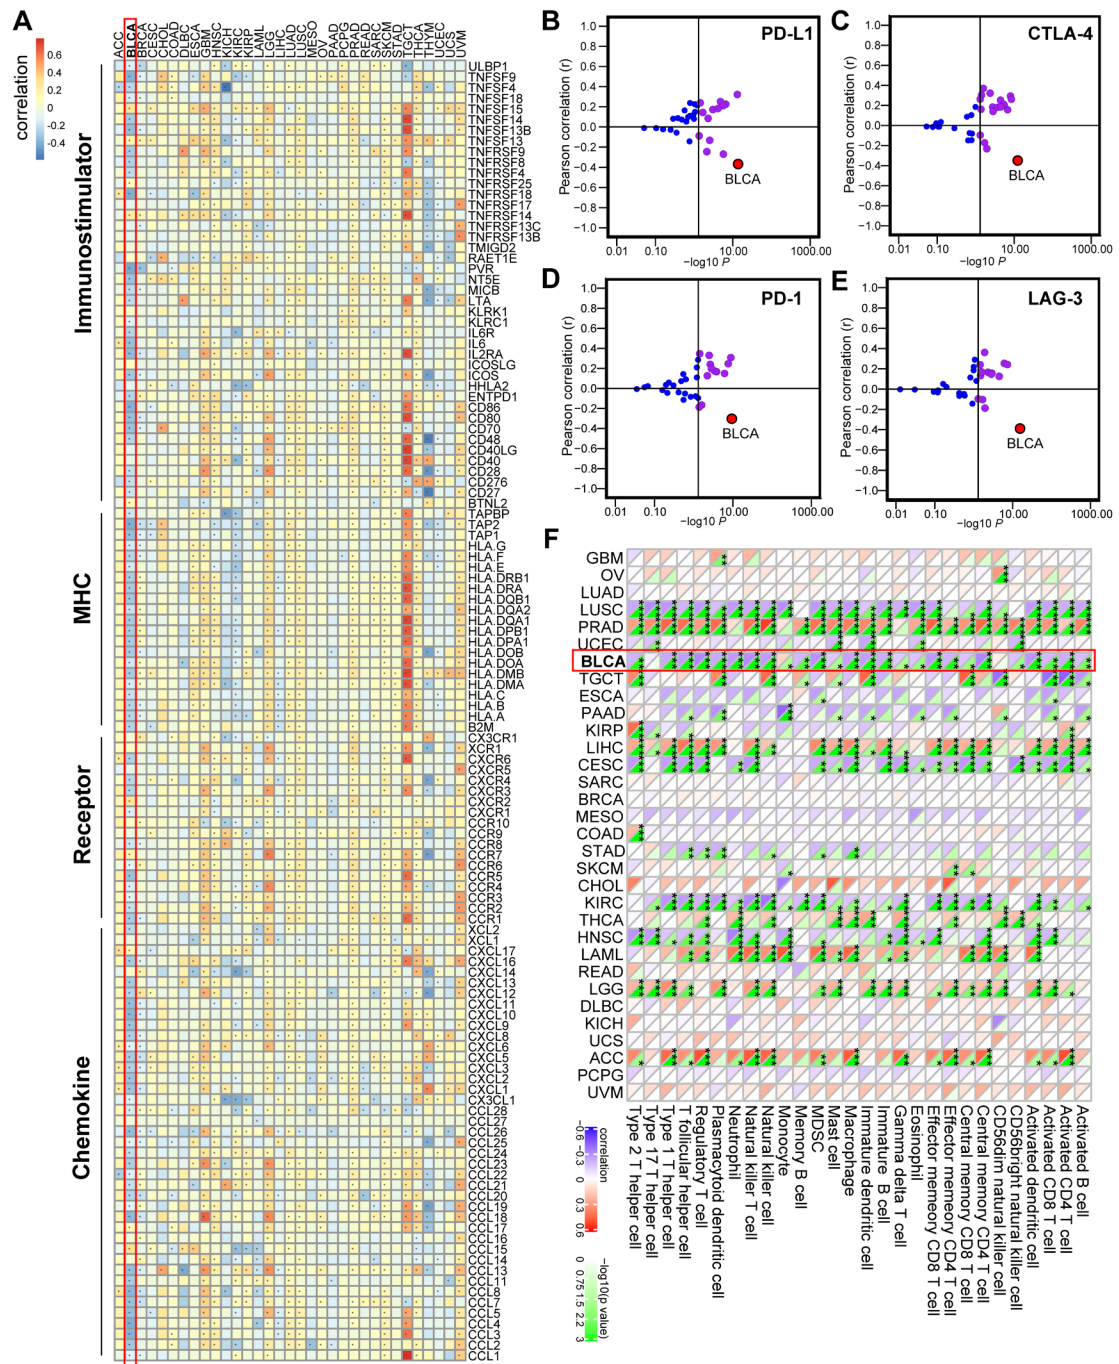

**Figure S3. Immunological role of S100A5 in multiple carcinomas.** (A) Different expression patterns of immune-stimulators, MHC, receptor, and chemokine between high and low S100A5 group; Red represents higher expressed genes, while blue represents lower expressed genes. (B-E) Correlation between S100A5 and programmed death-ligand 1 (PD-L1), cytotoxic T lymphocyte antigen (CTLA)-4, programmed death 1 (PD-1), and lymphocyte activation gene-3 (LAG-3). (F) Correlation between S100A5 and tumor-infiltrating immune cells in multiple carcinomas using the single-sample gene set enrichment analysis (ssGSEA) algorithm. Red, positive correlation; Blue,

negative correlation. \* $P < 0.05$ ; \*\* $P < 0.01$ ; \*\*\* $P < 0.001$ .

### GSE120736

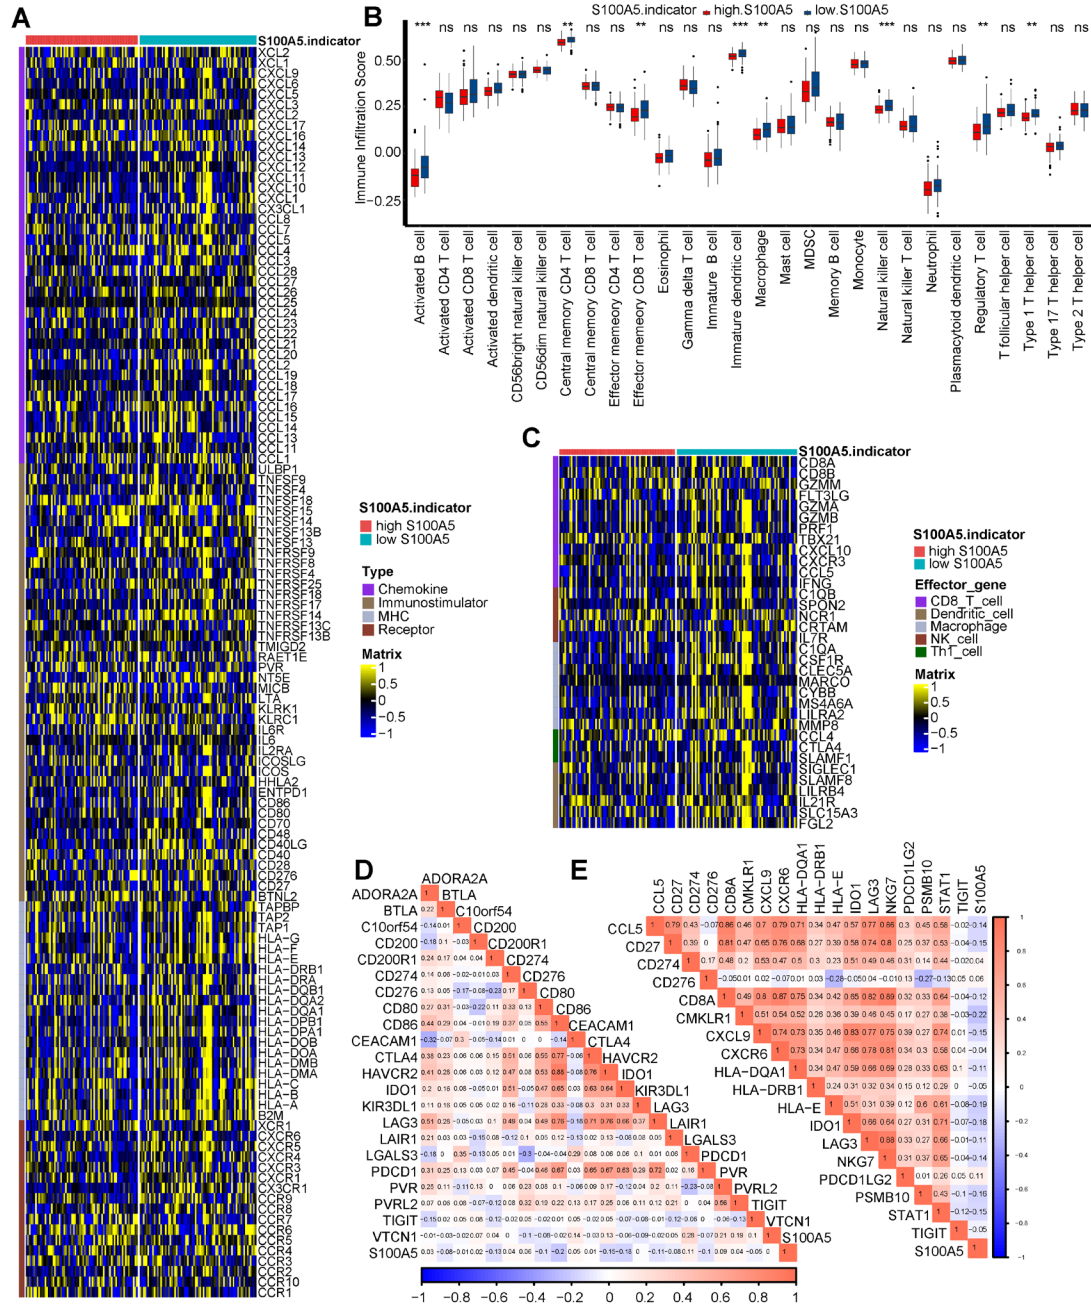

# GSE31684

**A**

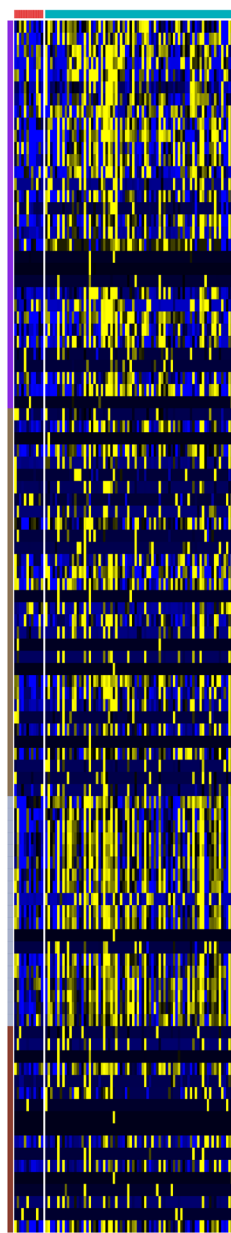

**S100A5.indicator**

CXCL1  
 CXCL9  
 CXCL8  
 CXCL16  
 CXCL5  
 CXCL3  
 CXCL2  
 CXCL14  
 CXCL13  
 CXCL12  
 CXCL11  
 CXCL10  
 CXCL1  
 CX3CL1  
 CCL18  
 CCL17  
 CCL16  
 CCL15  
 CCL14  
 CCL13  
 CCL12  
 CCL11  
 CCL10  
 CCL9  
 CCL8  
 CCL7  
 CCL6  
 CCL5  
 CCL4  
 CCL3  
 CCL2  
 CCL1  
 TNFSF9  
 TNFSF4  
 TNFSF14  
 TNFSF13  
 TNFSF9  
 TNFSF8  
 TNFSF4  
 TNFSF25  
 TNFSF17  
 TNFSF14  
 TNFSF13B  
 RAET1E  
 PVR  
 NT5E  
 MICB  
 IL8  
 IL6  
 IL2RA  
 ICOSLG  
 ICOS  
 HHLA2  
 ENTPD1  
 CD86  
 CD80  
 CD70  
 CD48  
 CD40LG  
 CD40  
 CD28  
 CD276  
 CD27  
 TAPBP  
 TAP2  
 TAP1  
 HLA-G  
 HLA-F  
 HLA-E  
 HLA-DRA  
 HLA-DQB1  
 HLA-DOA1  
 HLA-DPB1  
 HLA-DPA1  
 HLA-DOB  
 HLA-DOA  
 HLA-DNB  
 HLA-DMA  
 HLA-C  
 HLA-B  
 HLA-A  
 B2M  
 XCR1  
 CXCR6  
 CXCR5  
 CXCR4  
 CXCR3  
 CXCR2  
 CXCR1  
 CCR9  
 CCR8  
 CCR7  
 CCR6  
 CCR5  
 CCR4  
 CCR3  
 CCR2  
 CCR10  
 CCR1

**B**

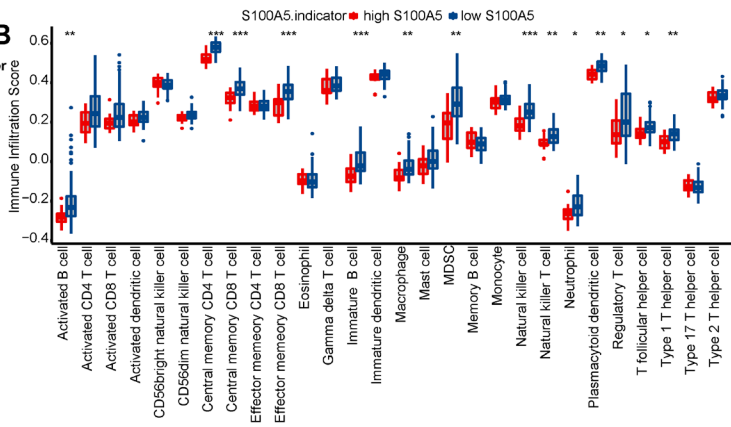

**C**

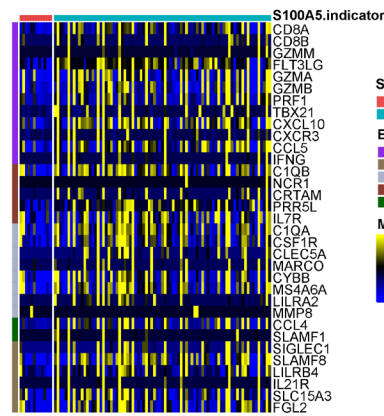

**S100A5.indicator**

CD8A  
 CD8B  
 GZMM  
 ILT3LG  
 GZMA  
 GZMB  
 PRF1  
 ITX21  
 CXCL10  
 CXCR3  
 CCL5  
 TNF  
 C10B  
 NCR1  
 NCR2  
 NCR3  
 IL7R  
 C10A  
 CSF1R  
 CLEC5A  
 MARCO  
 CYBB  
 MS4A6A  
 LILRA2  
 MMP8  
 CCL4  
 SLAMF1  
 SIGLEC1  
 SLAMF8  
 LILRB4  
 U21R  
 SLC15A3  
 TIGL2

**S100A5.indicator**

high S100A5  
 low S100A5

**Effector\_gene**

CD8\_T\_cell  
 Dendritic\_cell  
 Macrophage  
 NK\_cell  
 Th1\_cell

**Matrix**

1  
 0.5  
 0  
 -0.5  
 -1

**D**

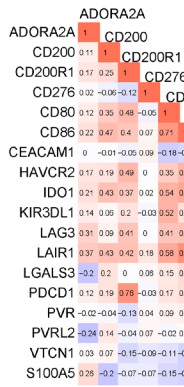

**E**

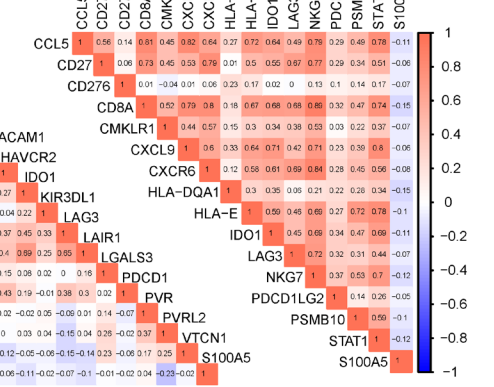

-1 -0.8 -0.6 -0.4 -0.2 0 0.2 0.4 0.6 0.8 1



GSE32894

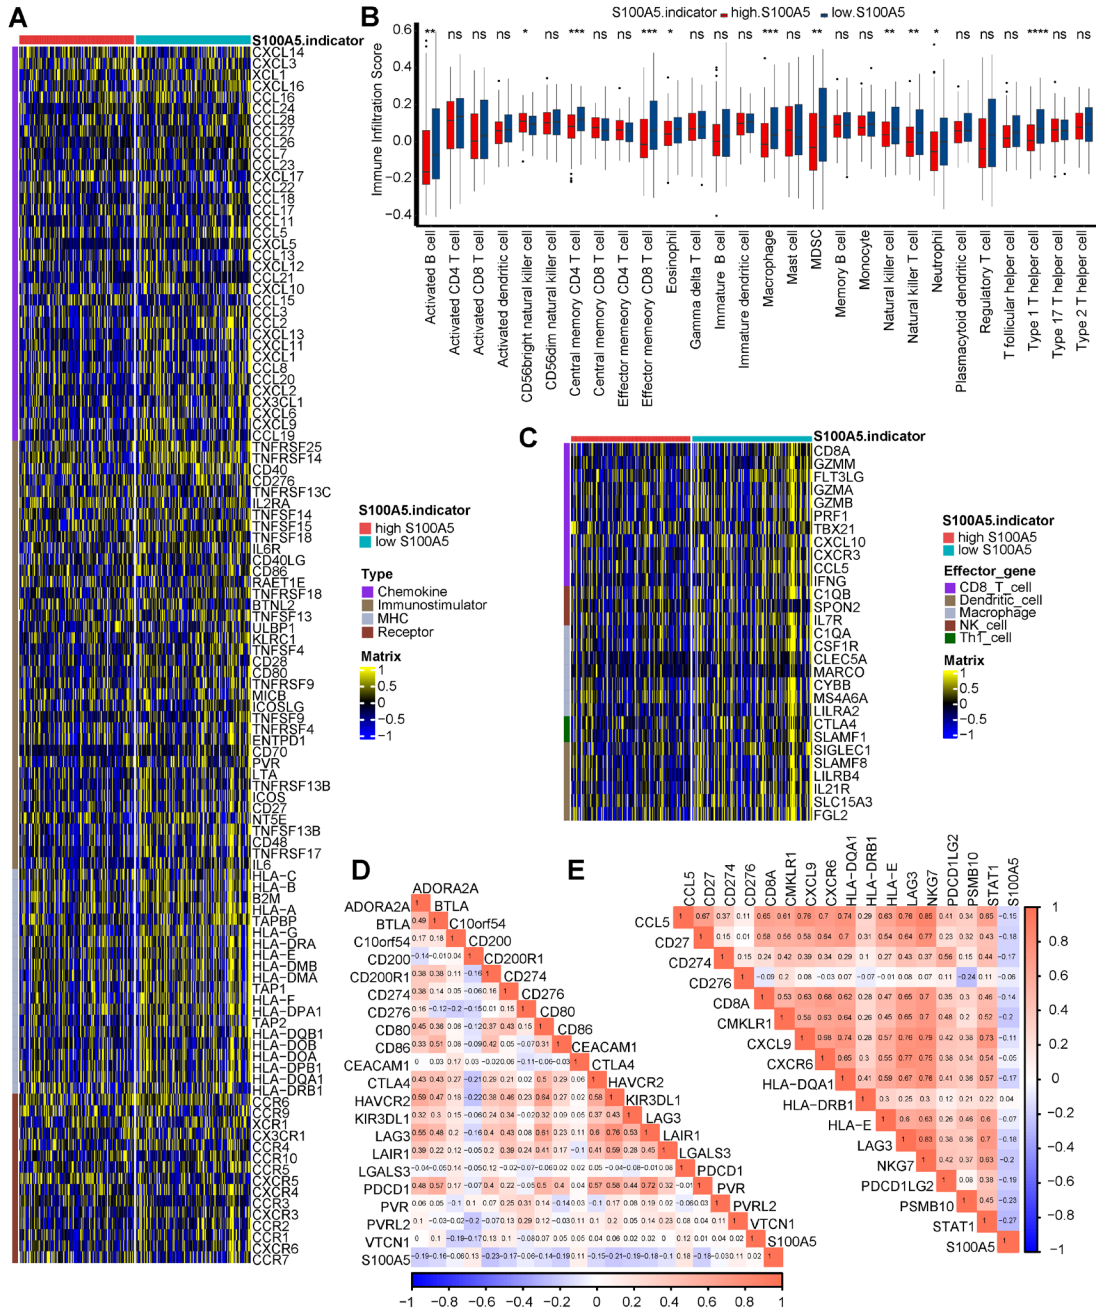

# GSE69795

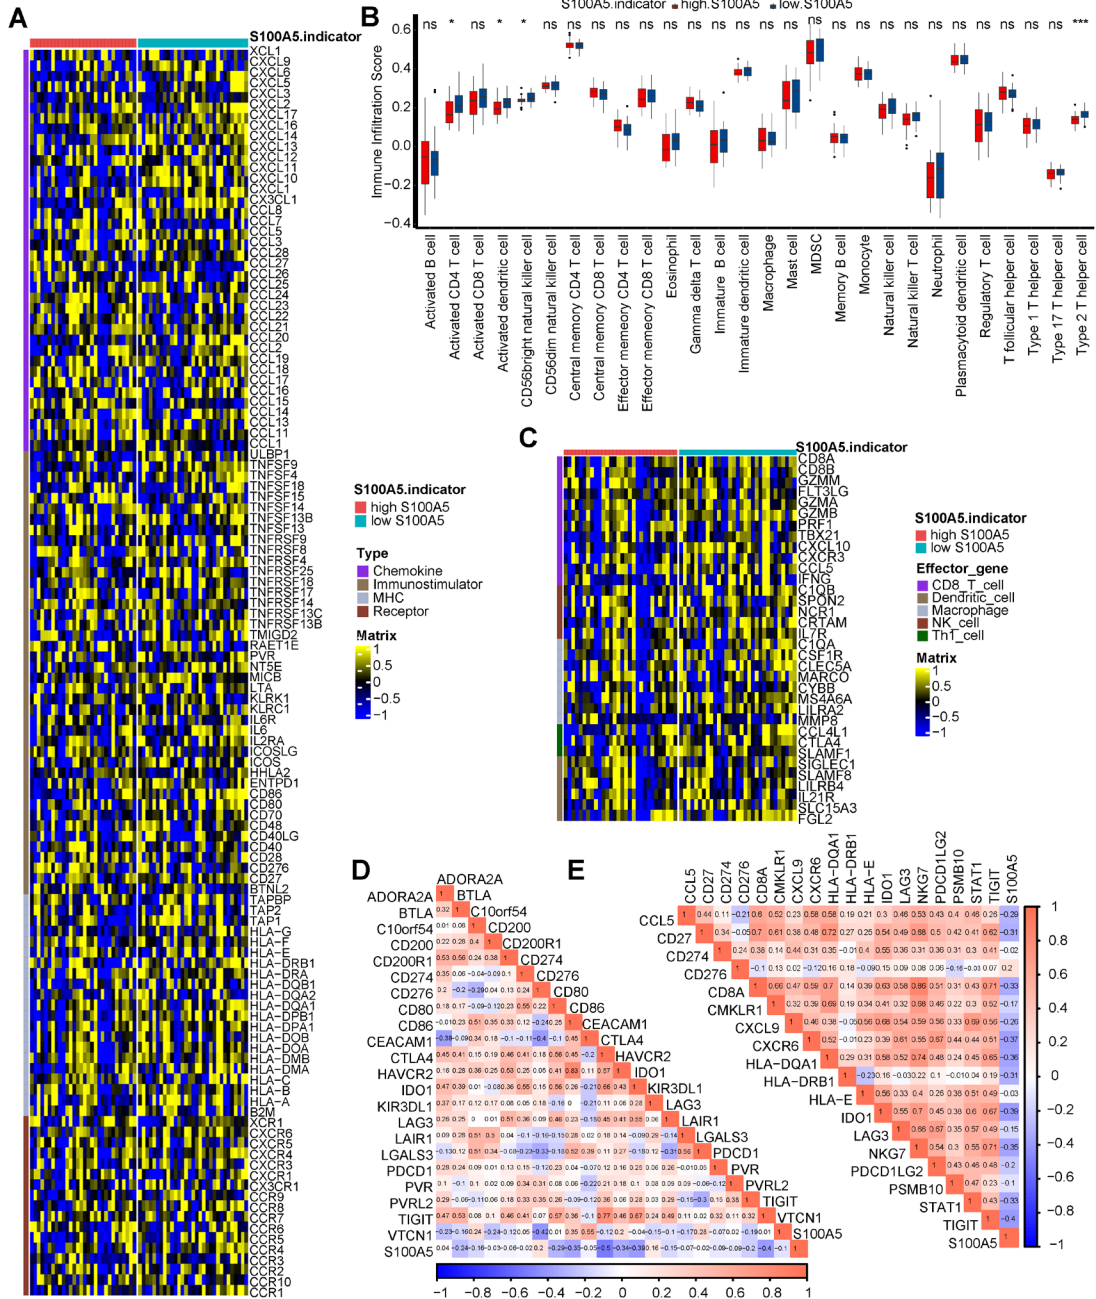

### E.MTAB.1803

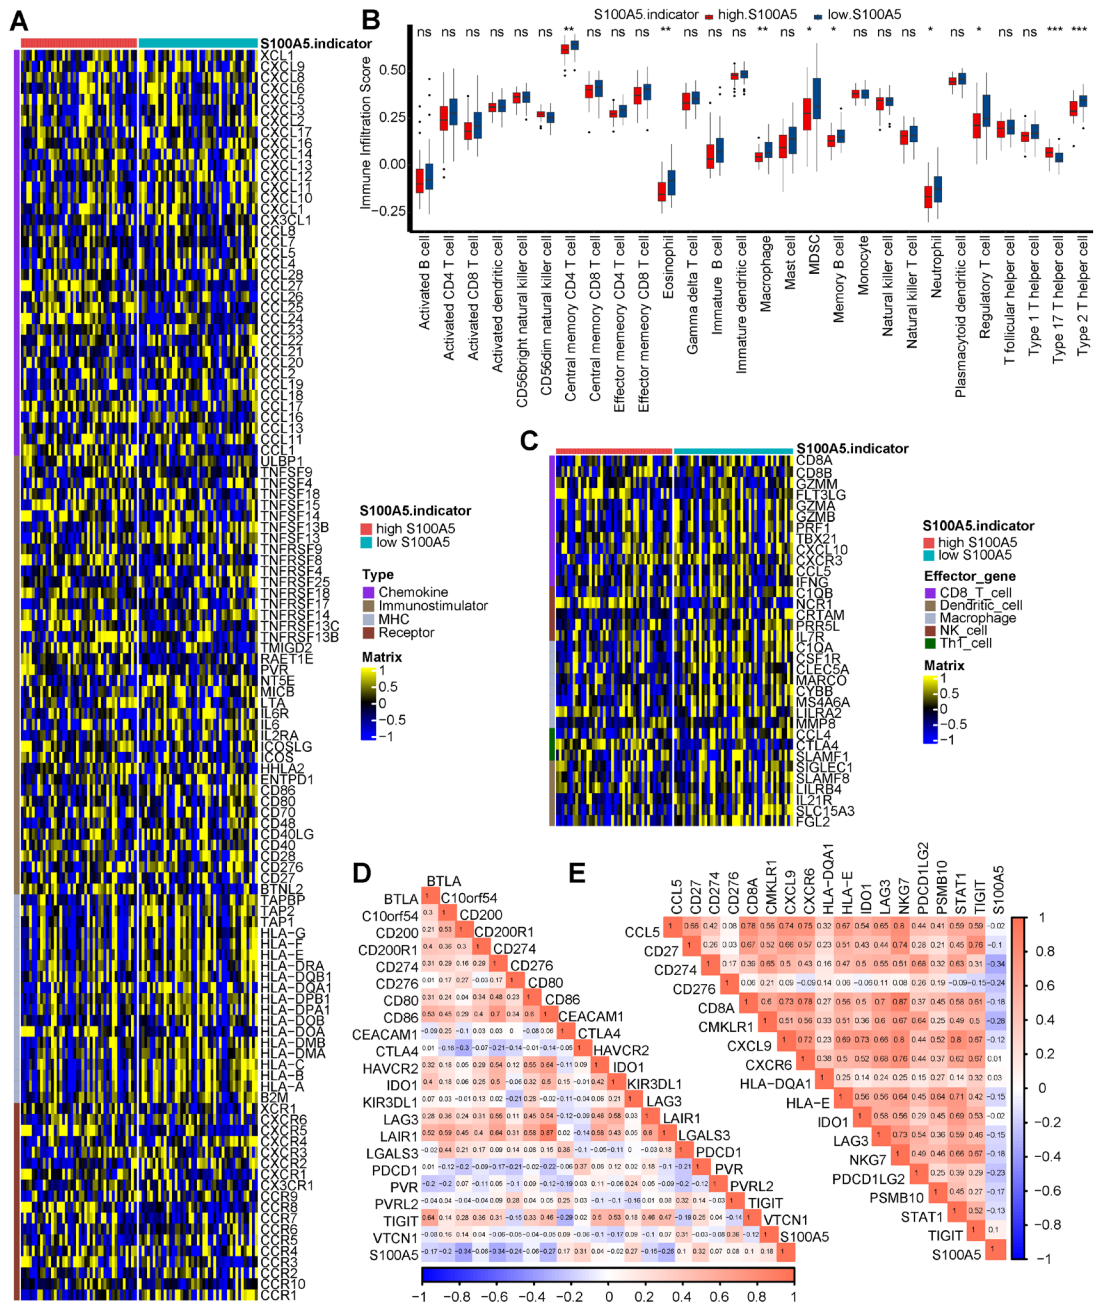

**Figure S4-8. Validation of the role of S100A5 in predicting microenvironment infiltration characterization in GSE120736, GSE31684, GSE32894, GSE69795 and E-MTAB-1803 databases. (A)** Different expression patterns of immunostimulators, MHC, receptor, and chemokine between high and low S100A5 group; Yellow represents higher expressed genes, while blue represents lower expressed genes. **(B)** The histogram of tumor-infiltrating immune cells using ssGSEA algorithm between high and low S100A5 groups; Red, high S100A5 group; Blue, low S100A5 group. **(C)** Different expression patterns of effector genes of CD8 T cells, dendritic cells,



macrophage cells, NK cells and Th1 cells between high and low S100A5 groups; Yellow represents higher expressed genes, while blue represents lower expressed genes. (D-E) Correlation between S100A5 and immune checkpoint inhibitor genes and T cell-inflamed genes respectively; Positive correlation was marked in orange, while negative correlation was marked in blue. \* $P < 0.05$ ; \*\* $P < 0.01$ ; \*\*\* $P < 0.001$ ; \*\*\*\* $P < 0.0001$ ; ns, not statistically significant.

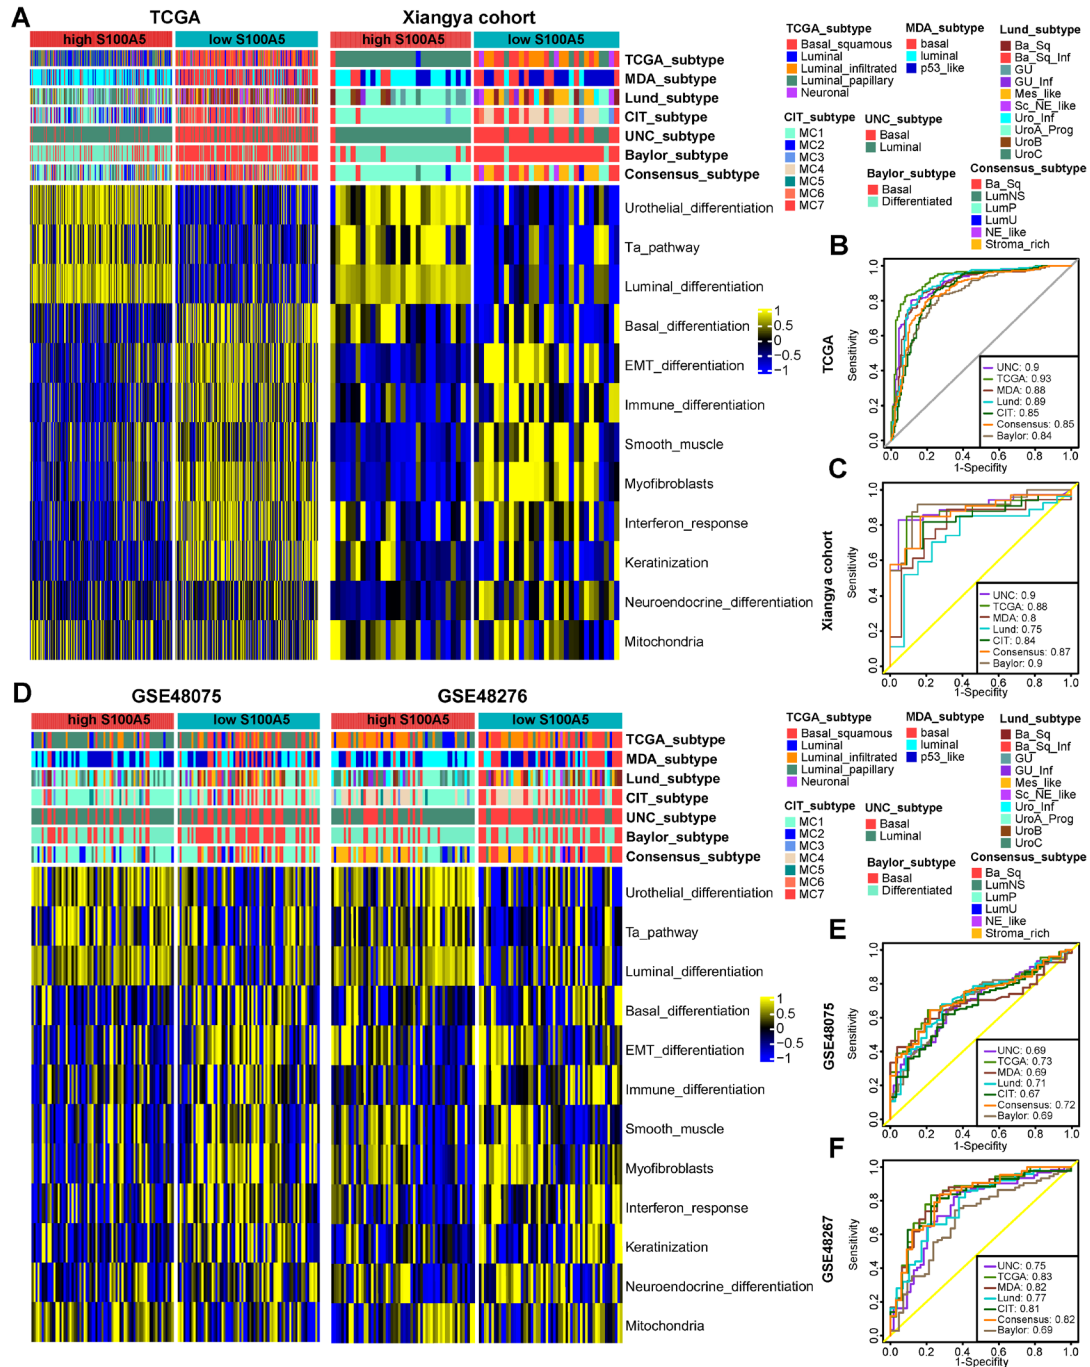

**Figure S9. The role of S100A5 in predicting molecular subtype of BLCA. (A)** Correlation between S100A5, molecular subtypes of BLCA, and twelve bladder cancer

associated signatures in TCGA-BLCA cohort and Xiangya cohort respectively. Activated pathways were marked in yellow, while the inhibited pathways were marked in blue. (B-C) Predictive accuracy of S100A5 for molecular subtypes of seven algorithms in TCGA-BLCA cohort (B) and Xiangya cohort (C) respectively. (D) Correlation between S100A5, molecular subtypes of BLCA, and twelve bladder cancer associated signatures in GSE48075 and GSE48276 respectively. (E-F) Predictive accuracy of S100A5 for molecular subtypes of seven algorithms in GSE48075 (E) and GSE48276 (F) respectively.

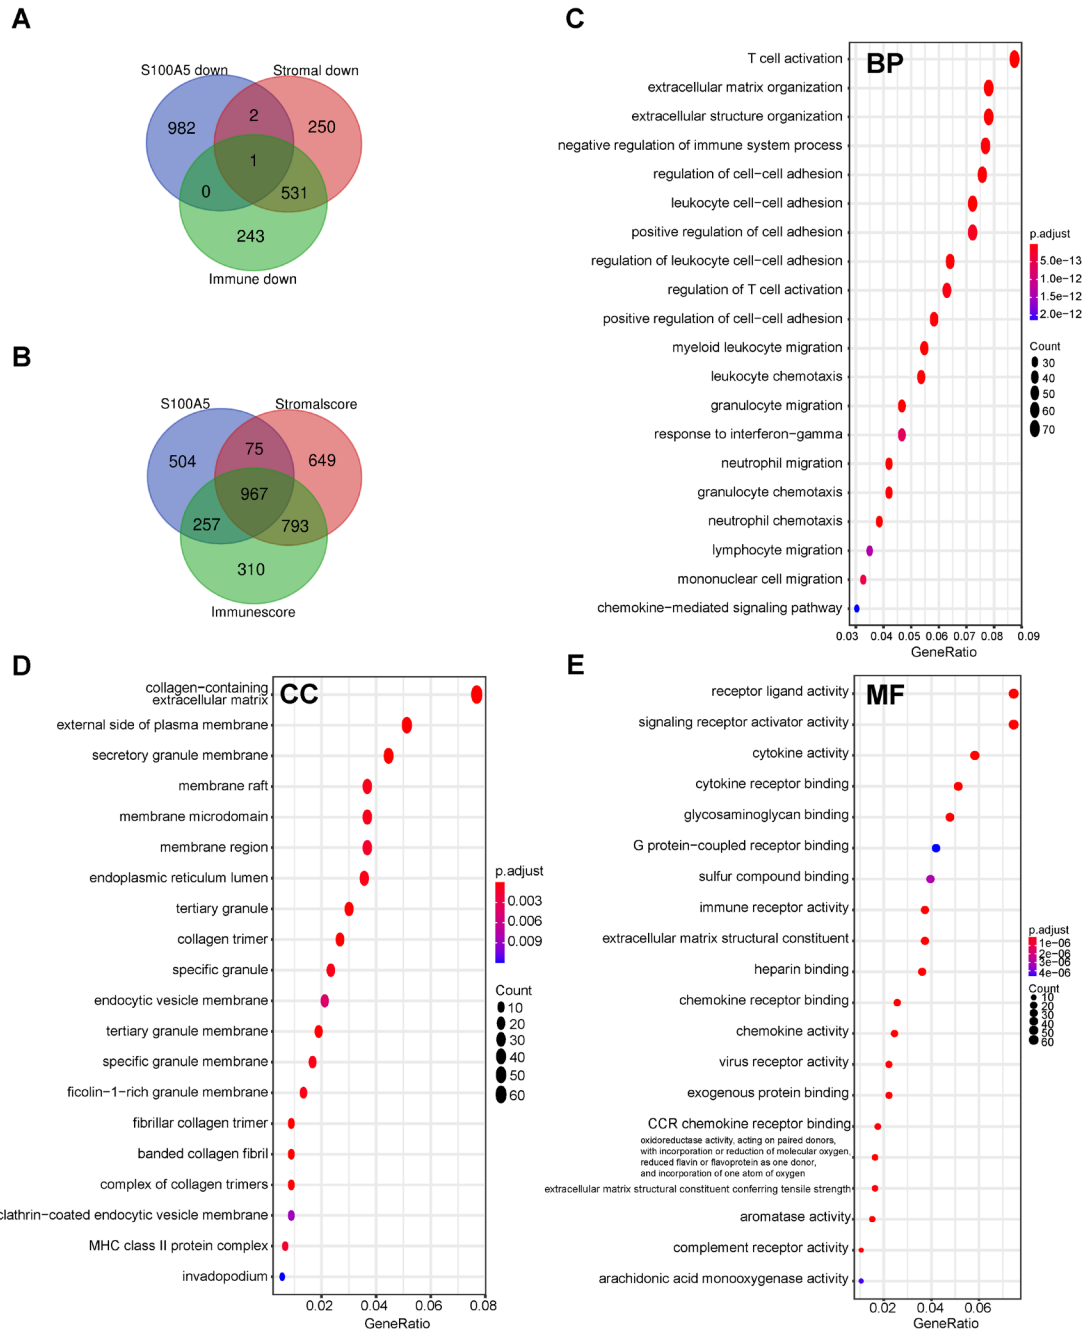

**Figure S10. Common differentially expressed genes (DEGs) and GO enrichment results between S100A5 expression, stromal and immune scores. (A) Common DEGs between low S100A5 group, low stromal score group and low immune score group. (B) Common DEGs between S100A5 expression, stromal score and immune score. (C-E) Biological process (BP) (C), cellular component (CC) (D) and molecular function (MF) (E) of common DEGs.**

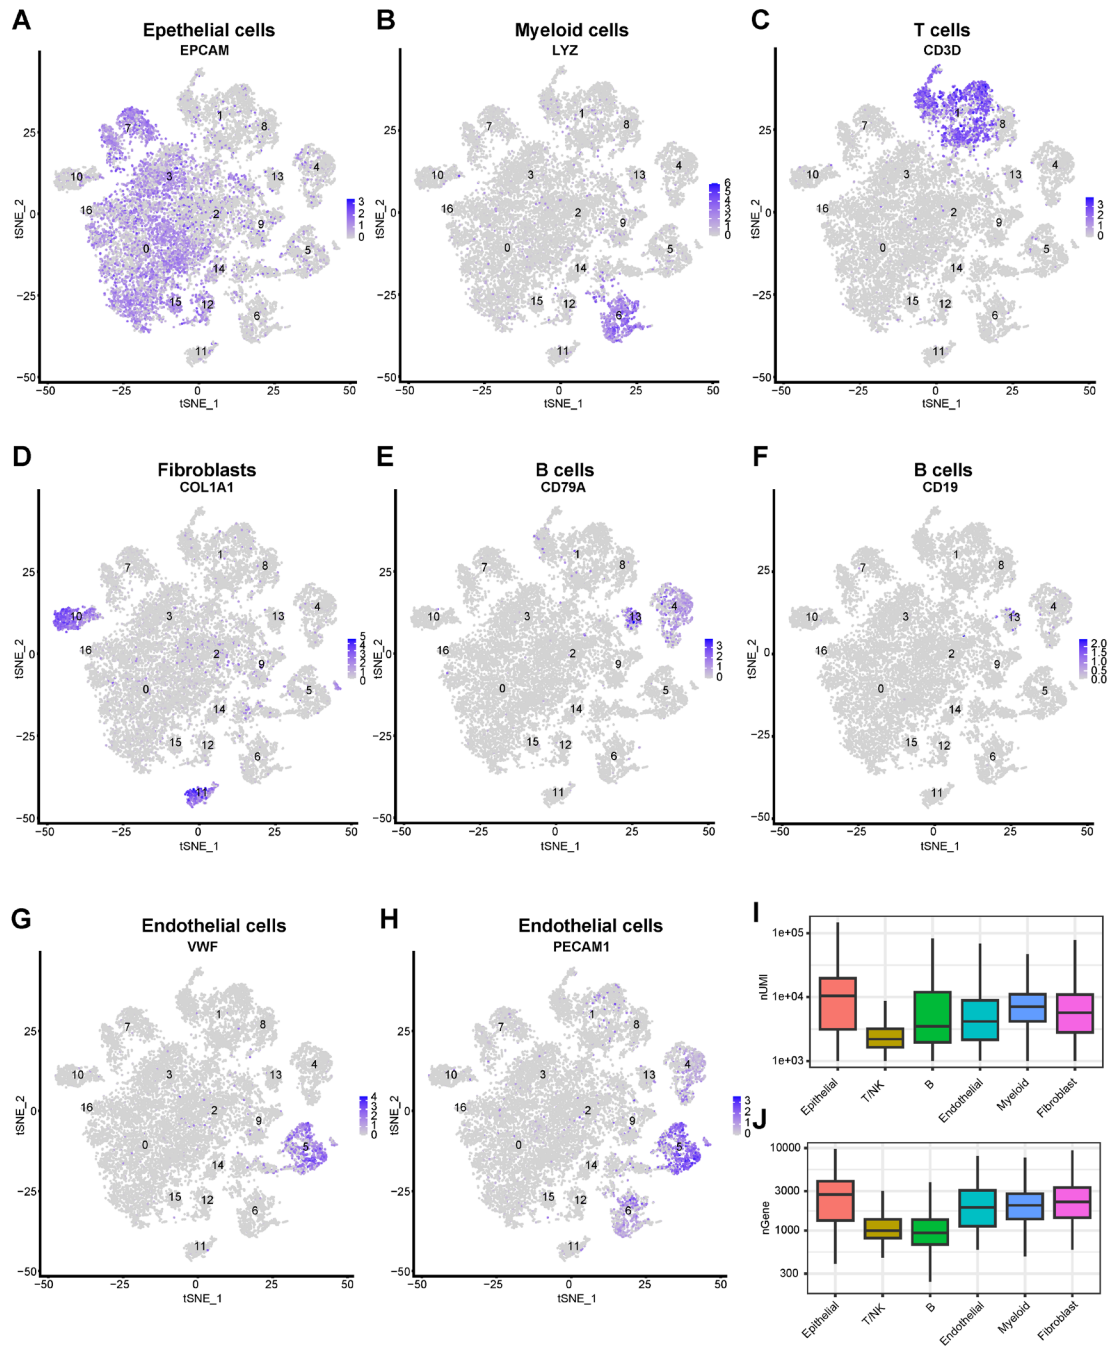

**Figure S11. Expression of marker genes for identified cell types in Xiangya scRNA-seq.** (A-H) Six major clusters were identified: epithelial cells (EPCAM), myeloid cells (LYZ), T cells (CD3D), fibroblasts (COL1A1), B cells (CD79A and CD19), and endothelial cells (PECAM1 and VWF). (I-J) Boxplots of nUMIs (I) and nGenes (J) among epithelial cells and immune cells.



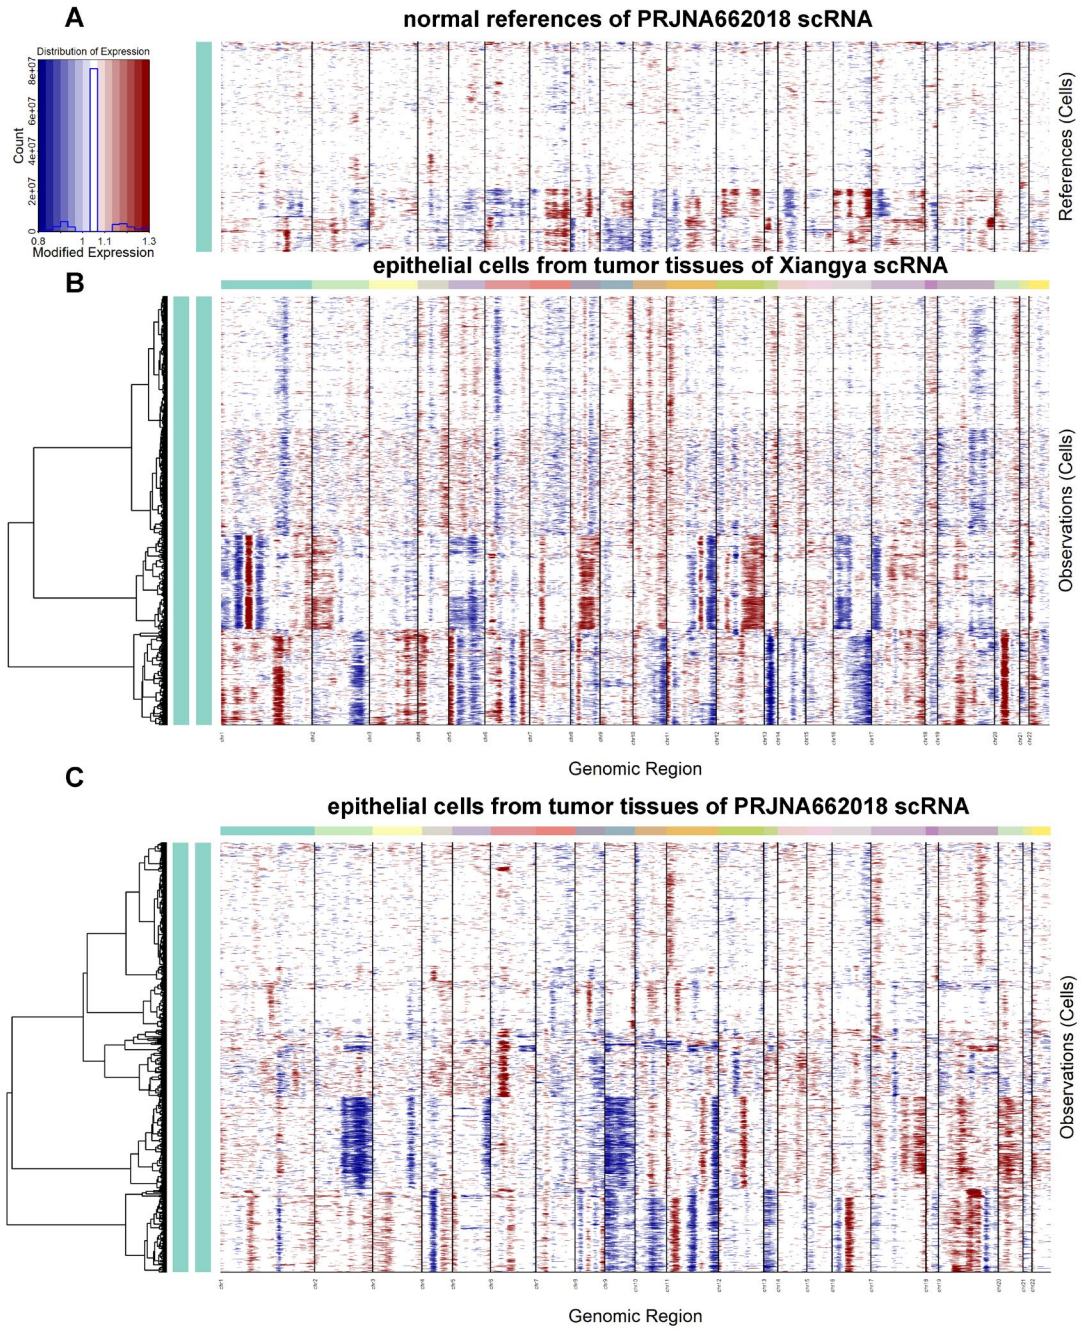

**Figure S12.** Copy number variations (CNVs) performed on each cell using InferCNV R package in Xiangya scRNA-seq and PRJNA662018 scRNA-seq.

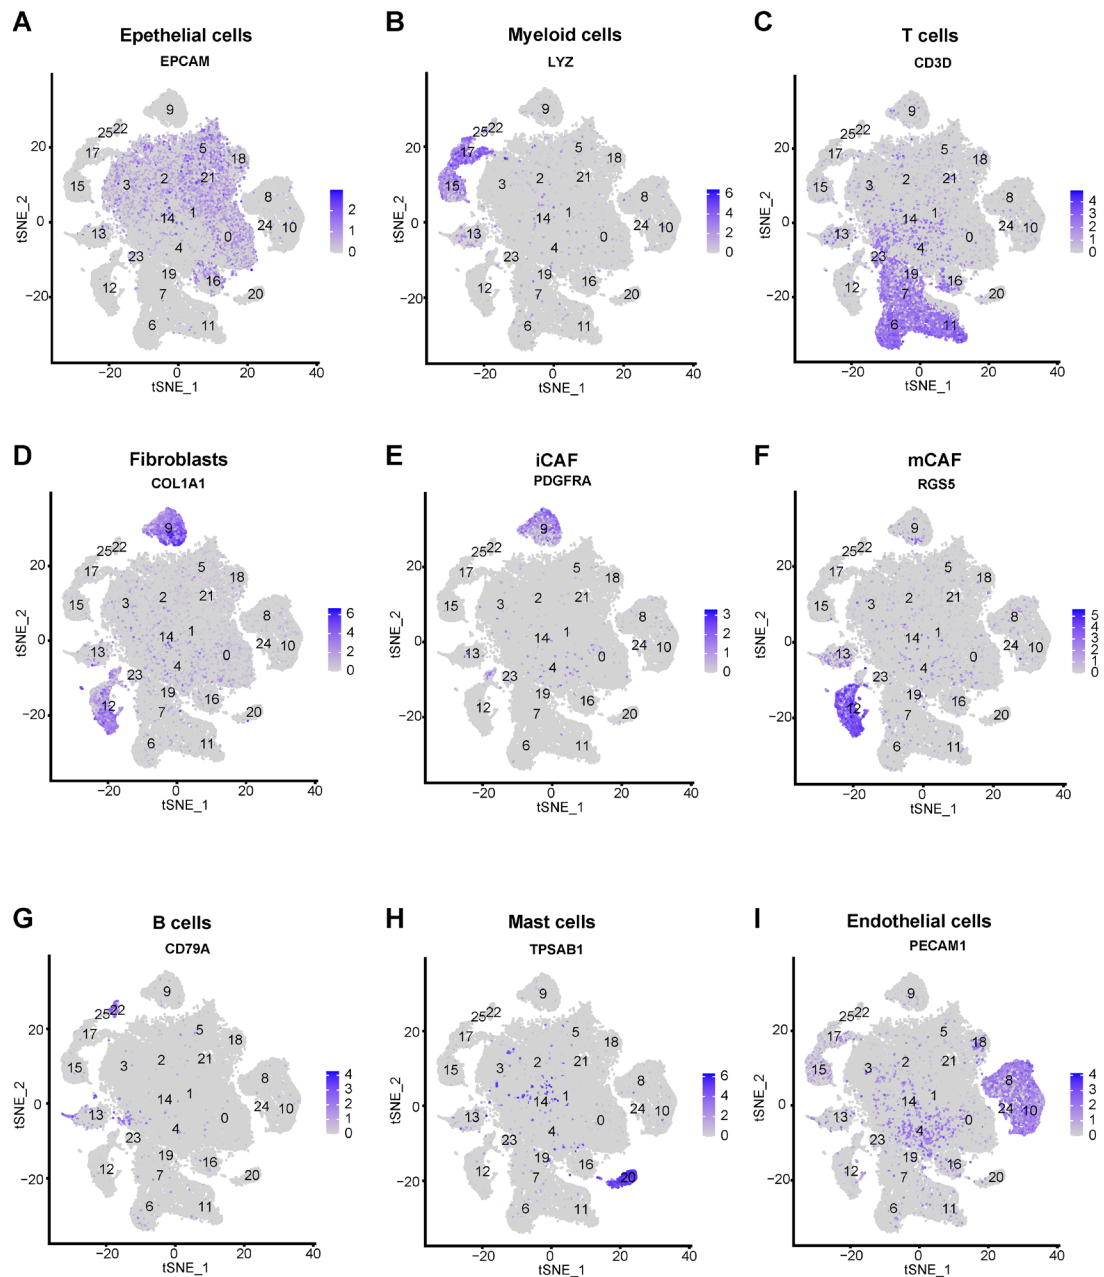

**Figure S13. Expression of marker genes for identified cell types in PRJNA662018 scRNA cohort.** Eight major clusters were identified: epithelial cells (EPCAM), myeloid cells (LYZ), T cells (CD3D), iCAF (COL1A1 and PDGFRA), mCAF (COL1A1 and RGS5), B cells (CD79A), Mast cells (TPSAB1) and endothelial cells (PECAM1).

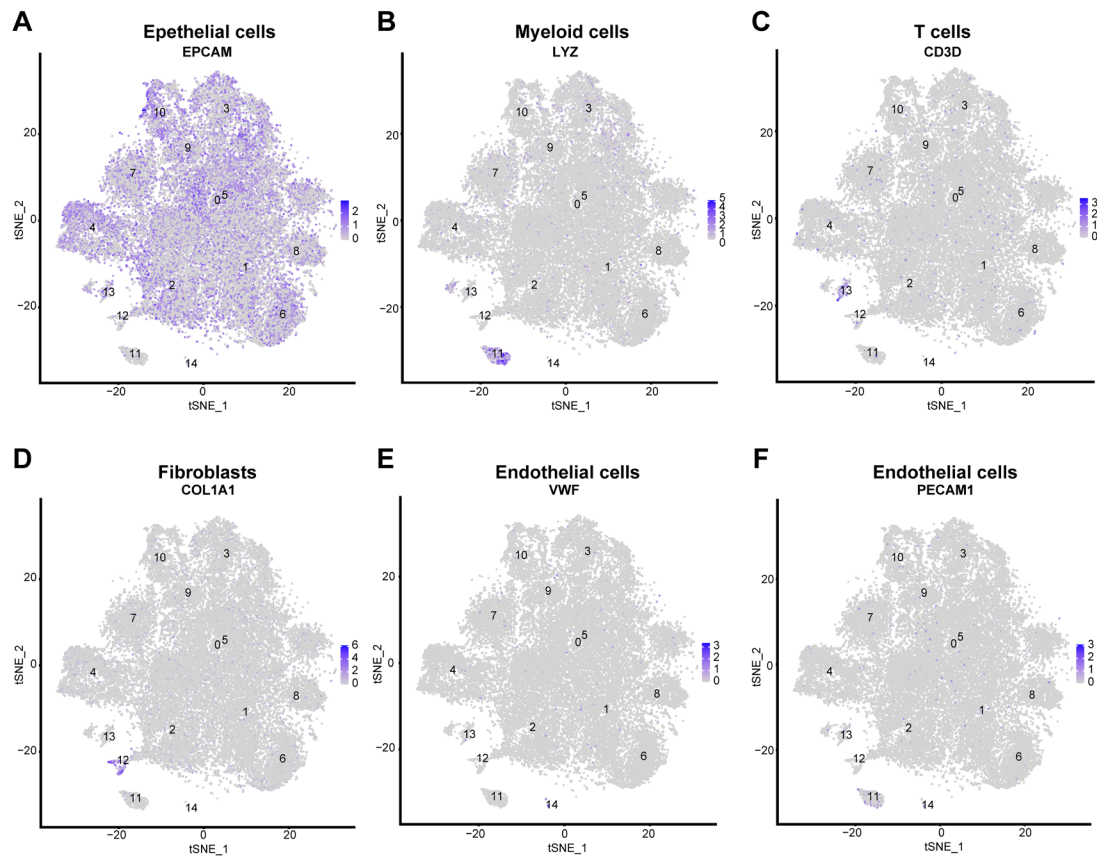

**Figure S14. Expression of marker genes for identified cell types in GSE135337.** Five major clusters were identified: epithelial cells (EPCAM), myeloid cells (LYZ), T cells (CD3D), fibroblasts (COL1A1), and endothelial cells (PECAM1 and VWF).



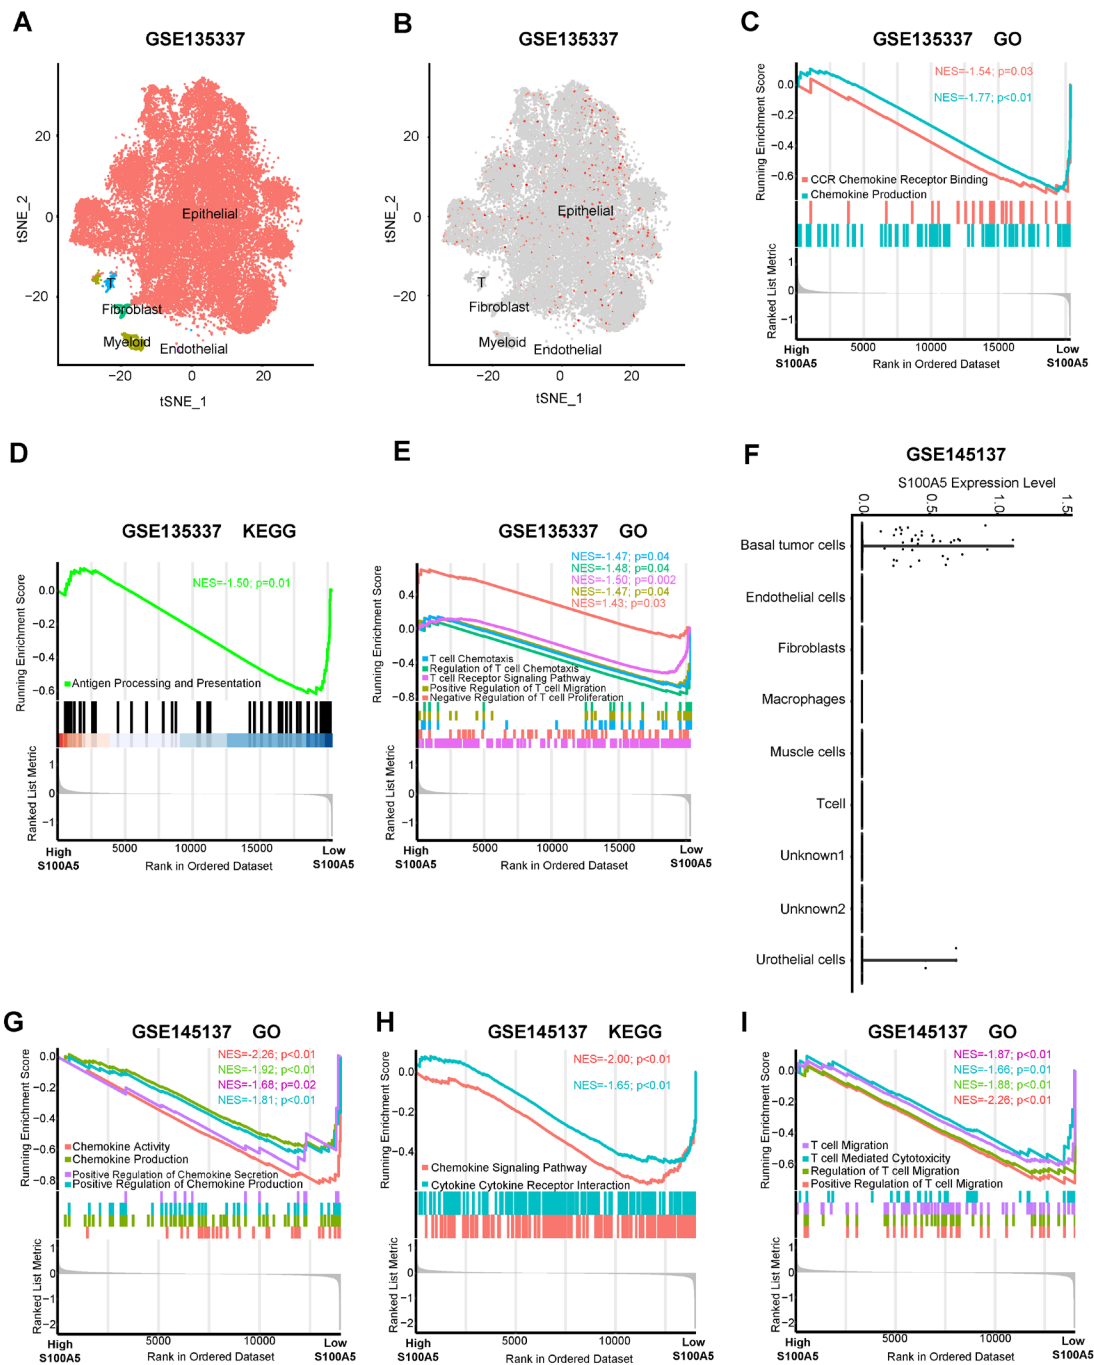

**Figure S15. Validation of the specific expression of S100A5 in malignant epithelial cells and its potential effects in the TME using GSE135337 and GSE145137.** (A) tSNE plot of all the single cells from GSE135337, with each color representing different major cell types. (B) tSNE plot shows the expression patterns of S100A5 on the single cell level in GSE135337. (C-D) GSEA shows enrichment of cytokines and chemokines secretion related GO pathways (C) and antigen processing and presentation related KEGG pathways (D) between different S100A5 expression groups in malignant epithelial cells of GSE135337 cohort. (E) GSEA shows enrichment

of T cell proliferation and activation related GO pathways between different S100A5 expression groups in malignant epithelial cells of GSE135337 cohort. (F) Violin plot shows expression level of S100A5 across different cell types in GSE145137. (G-H) GSEA shows enrichment of cytokines and chemokines secretion related GO pathways (G) and KEGG pathways (H) in basal tumor cells of GSE145137. (I) GSEA shows enrichment of T cell proliferation and activation related GO pathways in basal tumor cells of GSE145137.

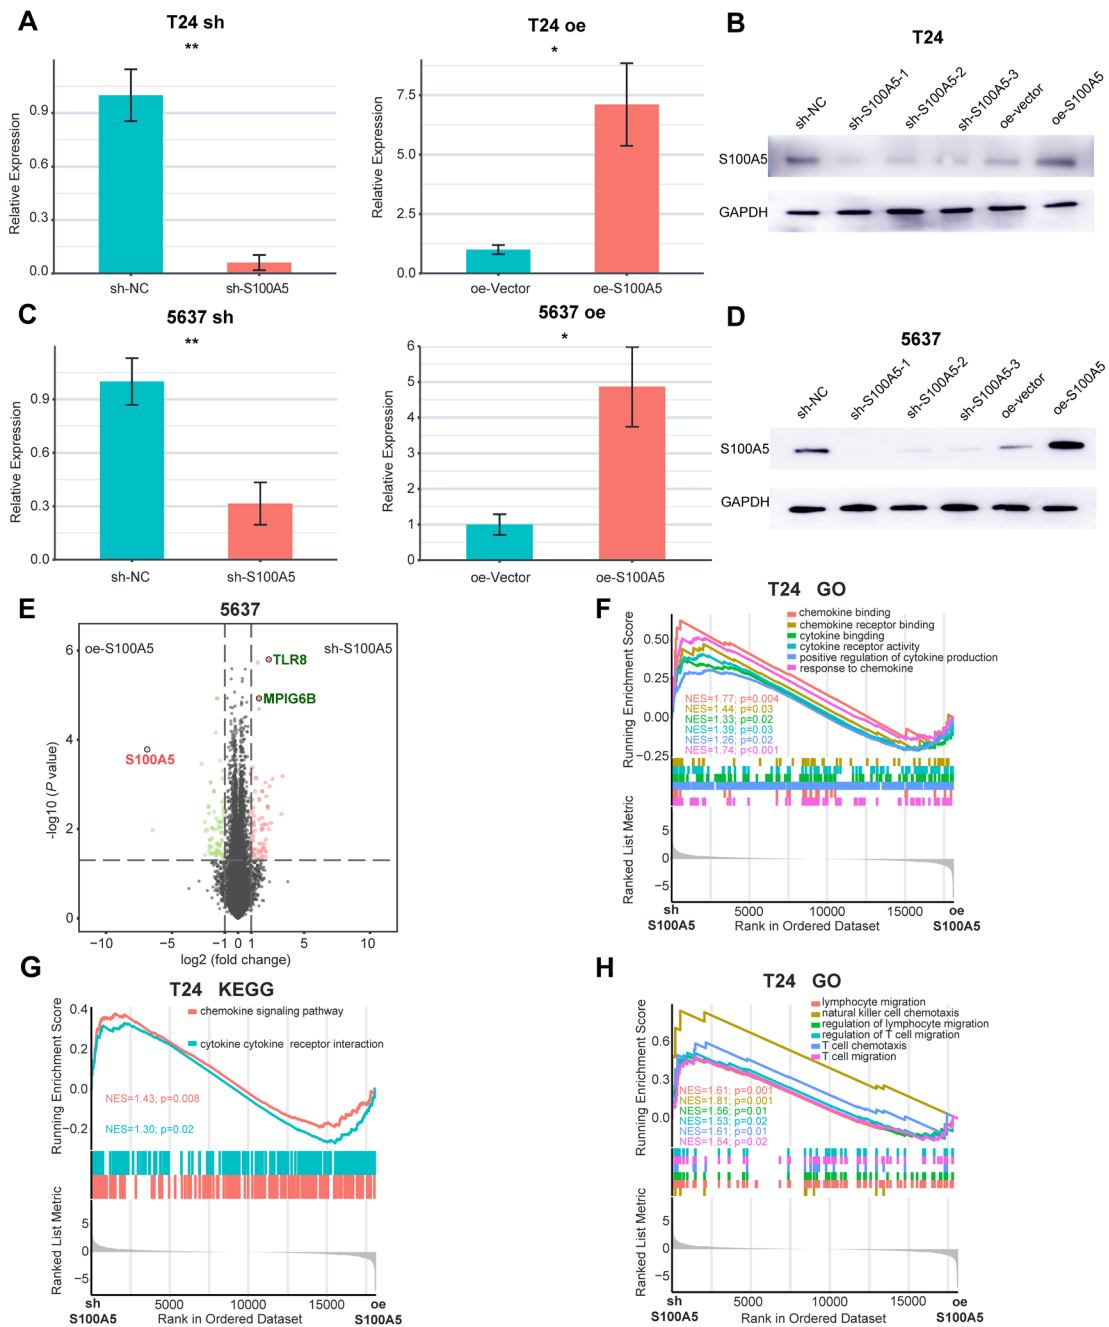

**Figure S16. Successful construction of S100A5 OE and S100A5 KD cell lines and**

**RNA-seq data of 5637 and T24 cell lines.** (A) Expression level of S100A5 in T24 cell line using RT-PCR. (B) Protein level of S100A5 in T24 cell line using Western Plot. (C). Expression level of S100A5 in 5637 cell line using RT-PCR. (D) Protein level of S100A5 in 5637 cell line using Western Plot. (E) Volcano plots between knockdown and overexpression of S100A5 in 5637 cell lines. (F-G) GSEA shows enrichment of cytokines and chemokines secretion related GO pathways (F) and KEGG pathways (G) between the knockdown and overexpression of S100A5 in T24 cells. (H) GSEA shows the enrichment of T cell proliferation and activation-related GO pathways between the knockdown and overexpression of S100A5 in T24 cell lines.

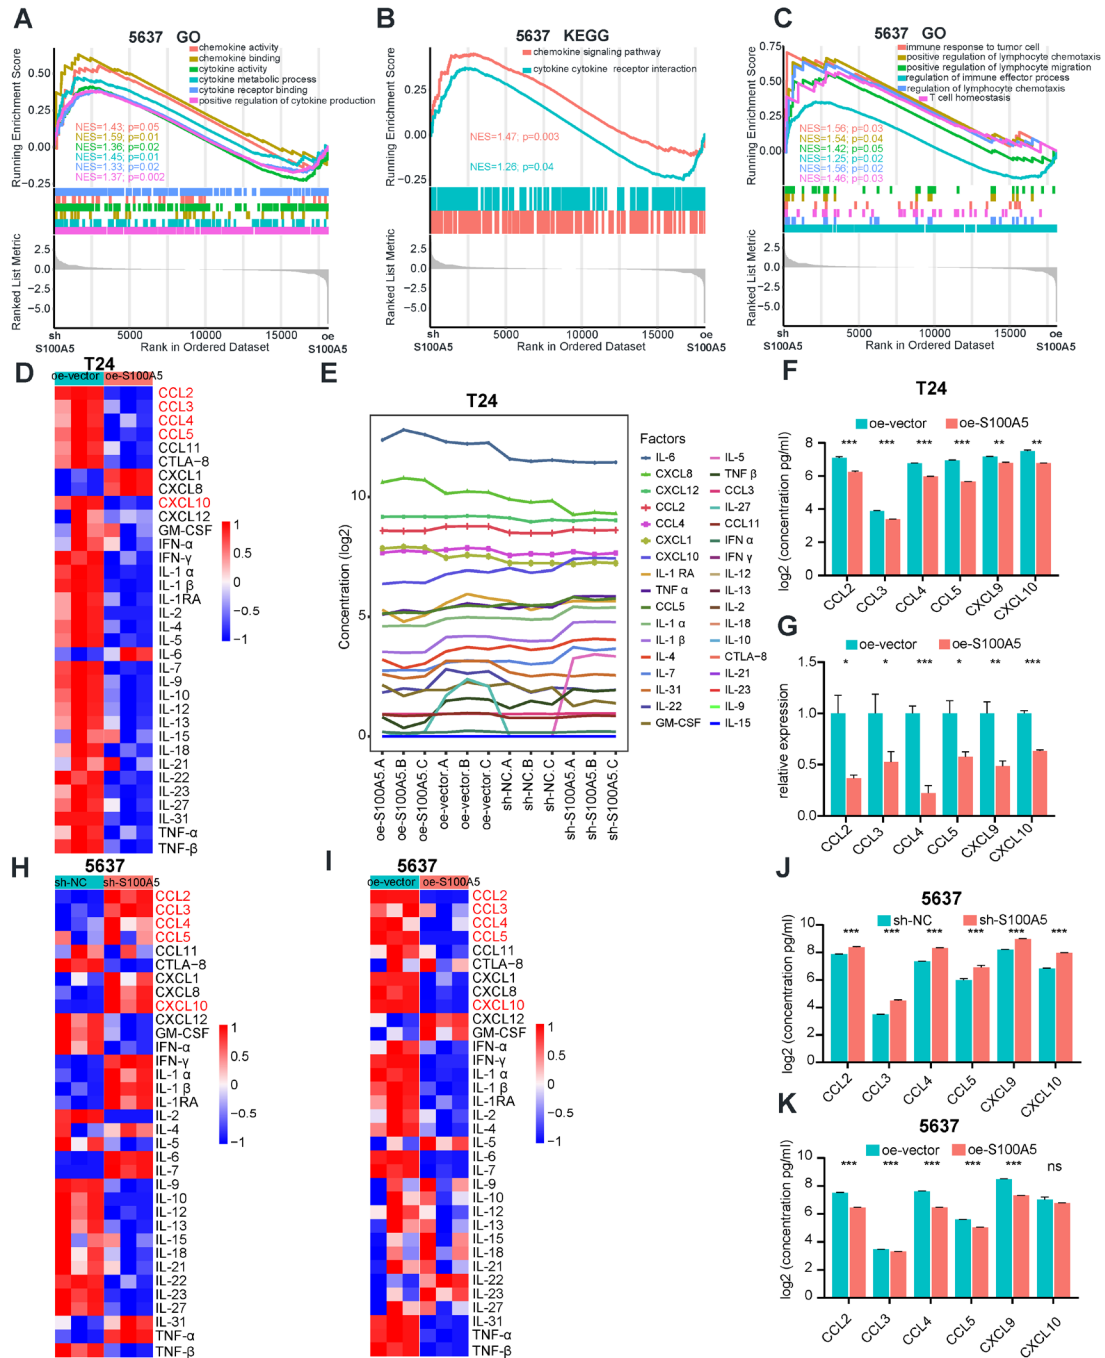

**Figure S17. Other in vitro experiments.** (A-B) GSEA shows enrichment of cytokines and chemokines secretion related GO pathways (A) and KEGG pathways (B) between knockdown and overexpression of S100A5 in 5637 cell lines. (C) GSEA shows enrichment of T cell proliferation and activation related GO pathways between knockdown and overexpression of S100A5 in 5637 cell lines. (D) Heatmap of multiple cytokines and chemokines detected by ProcartaPlex multiple immunoassays between overexpression of S100A5 and negative control groups in T24 cell line culture supernatants. (E) Line chart shows the concentrations of cytokines and chemokines

detected by ProcartaPlex multiple immunoassays among different T24 cell lines. (F-G) CCL2, CCL3, CCL4, CCL5, CXCL9 and CXCL10 levels detected using Elisa (F) and RT-PCR (G) respectively between overexpression of S100A5 and negative control groups in T24 cell line. (H-I) Heatmap of multiple cytokines and chemokines detected by ProcartaPlex multiple immunoassays between knockdown of S100A5 and negative control groups (H), overexpression of S100A5 and negative control groups (I) in 5637 cell culture supernatants. Red represents higher secretion, while blue represents lower secretion. (J-K) CCL2, CCL3, CCL4, CCL5, CXCL9 and CXCL10 levels detected using Elisa between knockdown of S100A5 and negative control groups (J), overexpression of S100A5 and negative control groups (K) in 5637 cell line. \* $P < 0.05$ ; \*\* $P < 0.01$ ; \*\*\* $P < 0.001$ ; \*\*\*\* $P < 0.0001$ ; ns, not statistically significant.

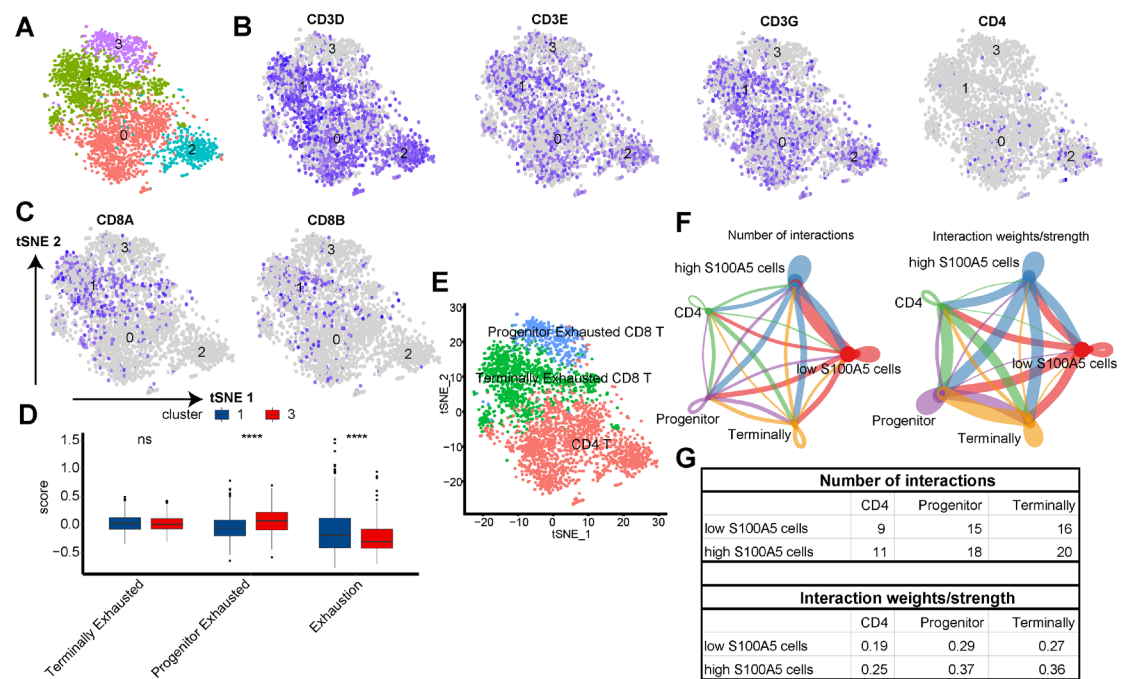

**Figure S18. Cell chat analysis in Xiangya scRNA-seq cohort.** (A) Subclustering of T cells on the tSNE plots of the Xiangya scRNA-seq. (B-C) Marker genes for T cell subgroups. (D) Boxplots of T cell exhaustion signatures between CD8<sup>+</sup> T cell subgroups. (E) tSNE plots of the marked T cell subgroups. (F) Network plots showing the number of interactions and weights/strength among high/low S100A5 expression malignant epithelial cells and T cell subgroups. (G) Number of interactions and weights/strength among high/low S100A5 expression malignant epithelial cells and T cell subgroups.

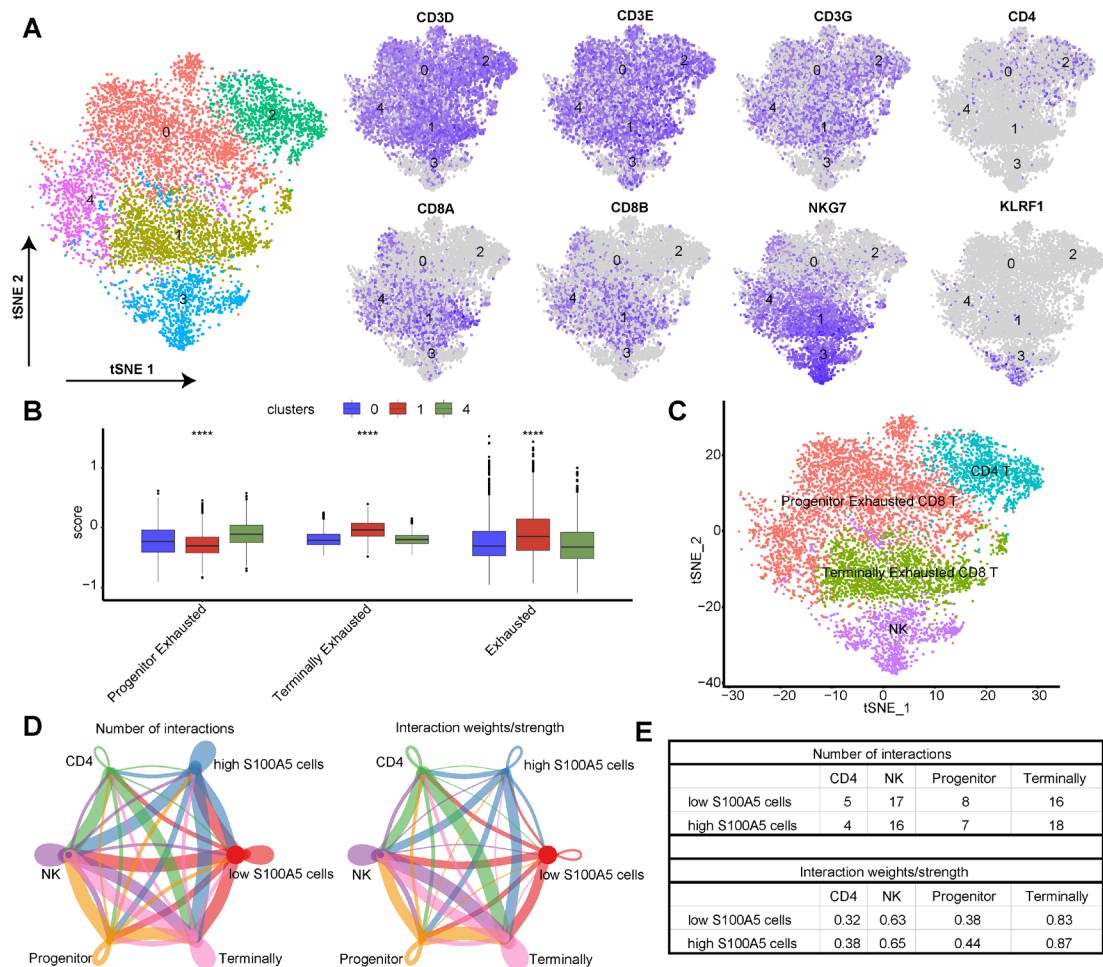

**Figure S19. Cell chat analysis in PRJNA662018 scRNA-seq cohort.** (A) Subclustering of T cells and marker genes on the tSNE plots of the PRJNA662018 scRNA-seq. (B) Boxplots of T cell exhaustion signatures between CD8<sup>+</sup> T cell subgroups. (C) tSNE plots of the marked T cell subgroups. (D) Network plots showing the number of interactions and weights/strength among high/low S100A5 expression malignant epithelial cells and T cell subgroups. (E) Number of interactions and weights/strength among high/low S100A5 expression malignant epithelial cells and T cell subgroups.



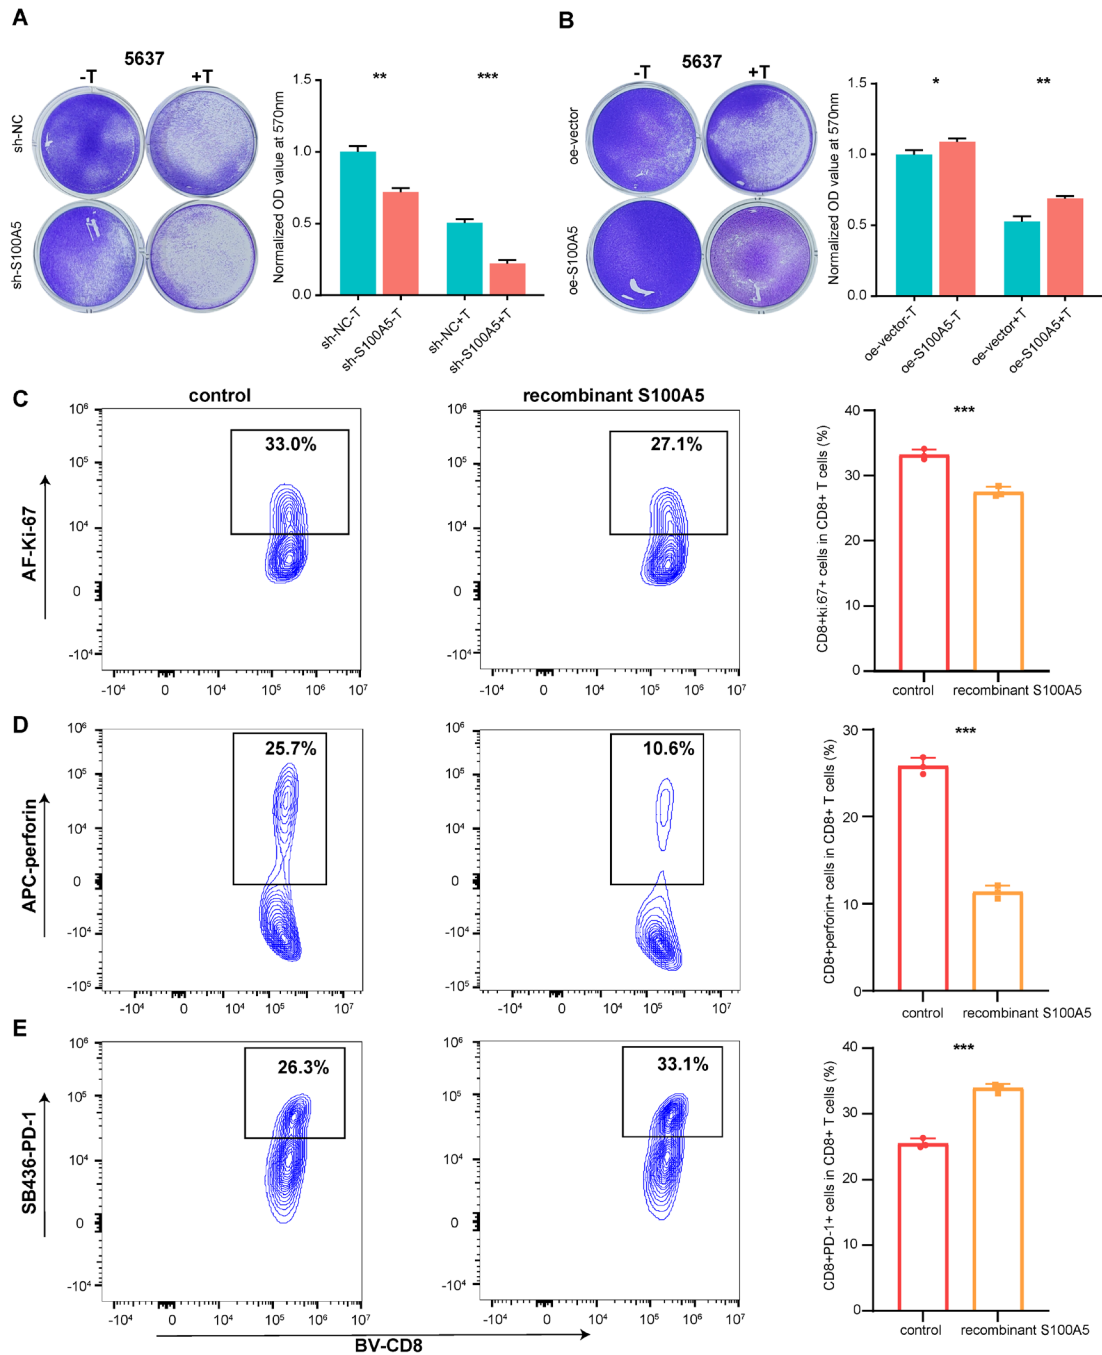

**Figure S20. Recombinant S100A5 inhibited the function of CD8<sup>+</sup> T cells.** (A) Representative images and histogram plots of T cell-mediated tumor cell-killing assay between S100A5 knocking down and negative control groups in 5637 cell line. The OD values were normalized by the mean value in sh-NC group without T cell coculture. (B) Representative images and histogram plots of T cell-mediated tumor cell-killing assay between S100A5 overexpression and negative control groups in 5637 cell line. The OD values were normalized by the mean value in oe-vector group without T cell coculture. (C-E) Flow cytometry analysis shows the different Ki-67 (C), perforin (D) and PD-1



(E) expression on effector T cells after culture with Recombinant S100A5 or isotype control.  $*P < 0.05$ ;  $**P < 0.01$ ;  $***P < 0.001$ .

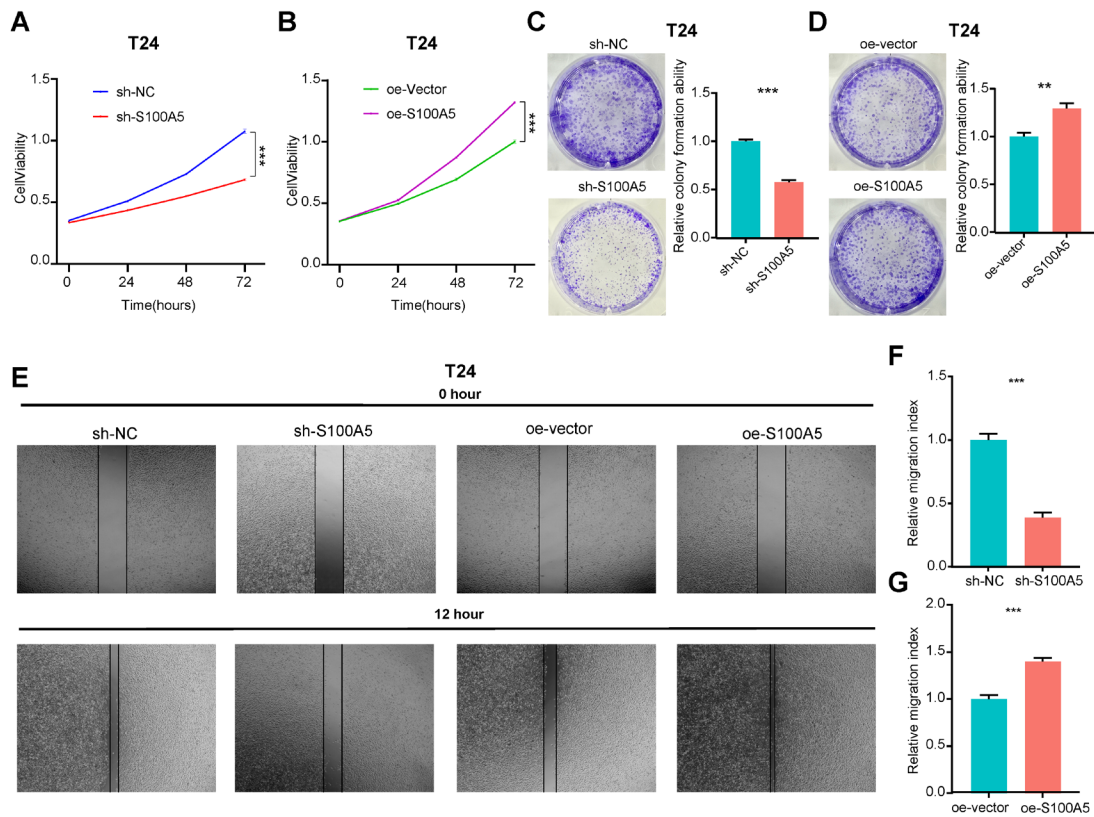

**Figure S21. S100A5 acts as an oncogene and thus promotes tumor proliferation and invasion.** (A-B) MTT cell viability assays of S100A5 knockdown (A) and overexpression (B) groups compared with their negative control in the T24 cell line. (C) Colony formation assays between S100A5 knockdown and negative control group in the T24 cell line. (D) Colony formation assays between S100A5 overexpression and negative control group in the T24 cell line. (E) Representative images of wound healing assays among S100A5 knockdown, overexpression, and their negative controls in the T24 cell line. (F-G) Histogram plots of the relative migration index between oe S100A5 knockdown and negative control (F) and S100A5 overexpression and negative control (G). Values were normalized to those of negative control groups.  $**P < 0.01$ ;  $***P < 0.001$ .

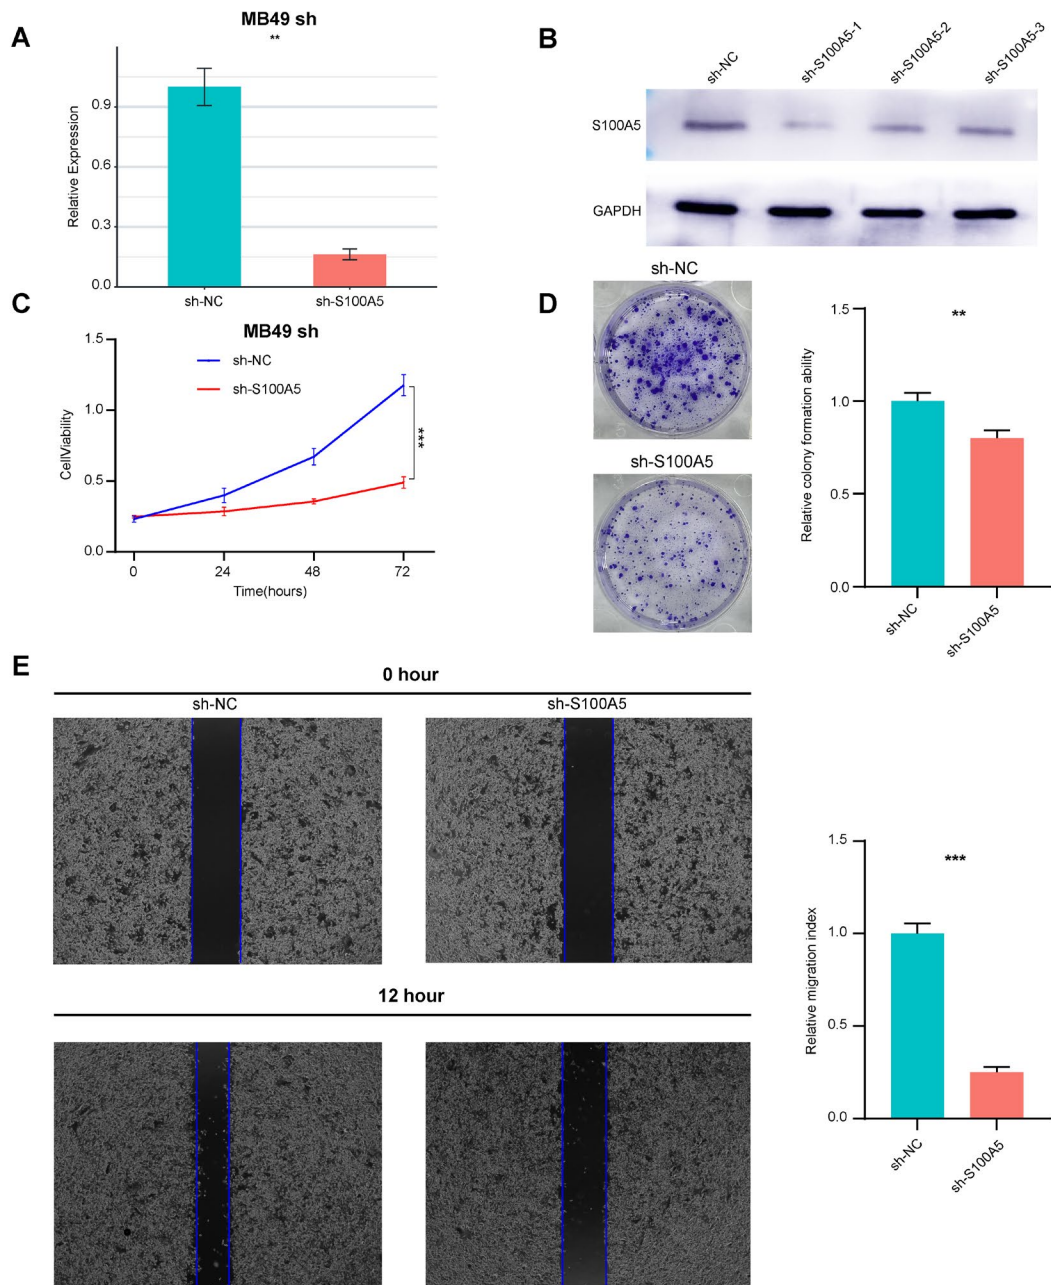

**Figure S22. Cancer phenotype experiments in MB49 cell line.** (A) Expression level of S100A5 in MB49 cell line using RT-PCR. (B) Protein level of S100A5 in MB49 cell line using Western Plot. (C) MTT cell viability assay between S100A5 knocking down and negative control groups in MB49 cell lines. (D) Colony formation assays between S100A5 knocking down and negative control group in MB49 cell line. (E) Representative images of wound healing assays and histogram plots of relative migration index between S100A5 knocking down and negative control groups in MB49 cell line. \*\* $P < 0.01$ ; \*\*\* $P < 0.001$ .

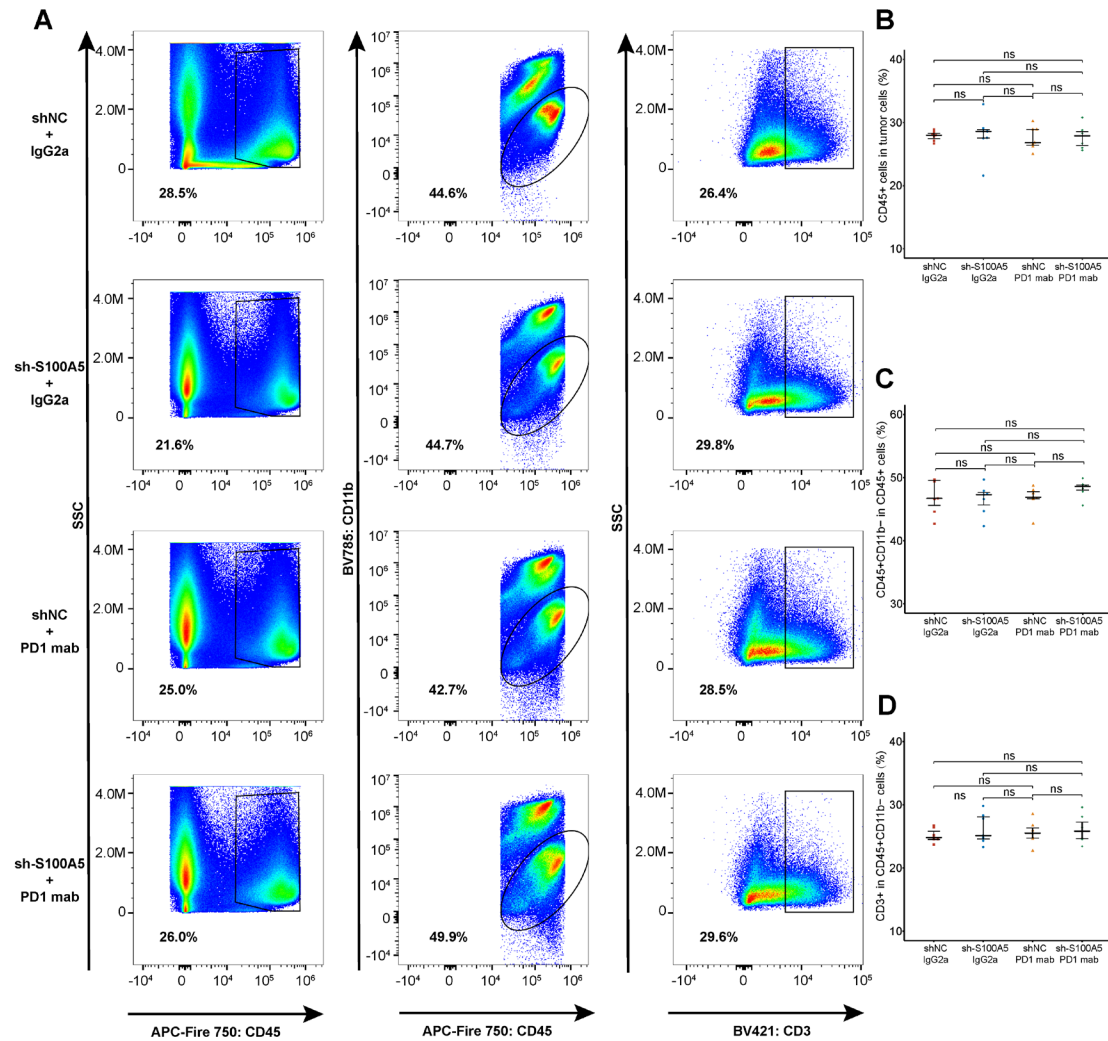

**Figure S23. Other flow cytometry analysis for in vivo experiment.** (A) Representative contour plots show the proportion of leukocytes (CD45<sup>+</sup>) in tumor cells, lymphoid cells (CD45<sup>+</sup>CD11b<sup>-</sup>) in leukocytes and T cells (CD3<sup>+</sup>) in lymphoid cells respectively. (B-D) Quantification results of flow cytometry analysis for proportion of leukocytes (CD45<sup>+</sup>) in tumor cells (B), lymphoid cells (CD45<sup>+</sup>CD11b<sup>-</sup>) in leukocytes (C) and T cells (CD3<sup>+</sup>) in lymphoid cells (D) respectively.

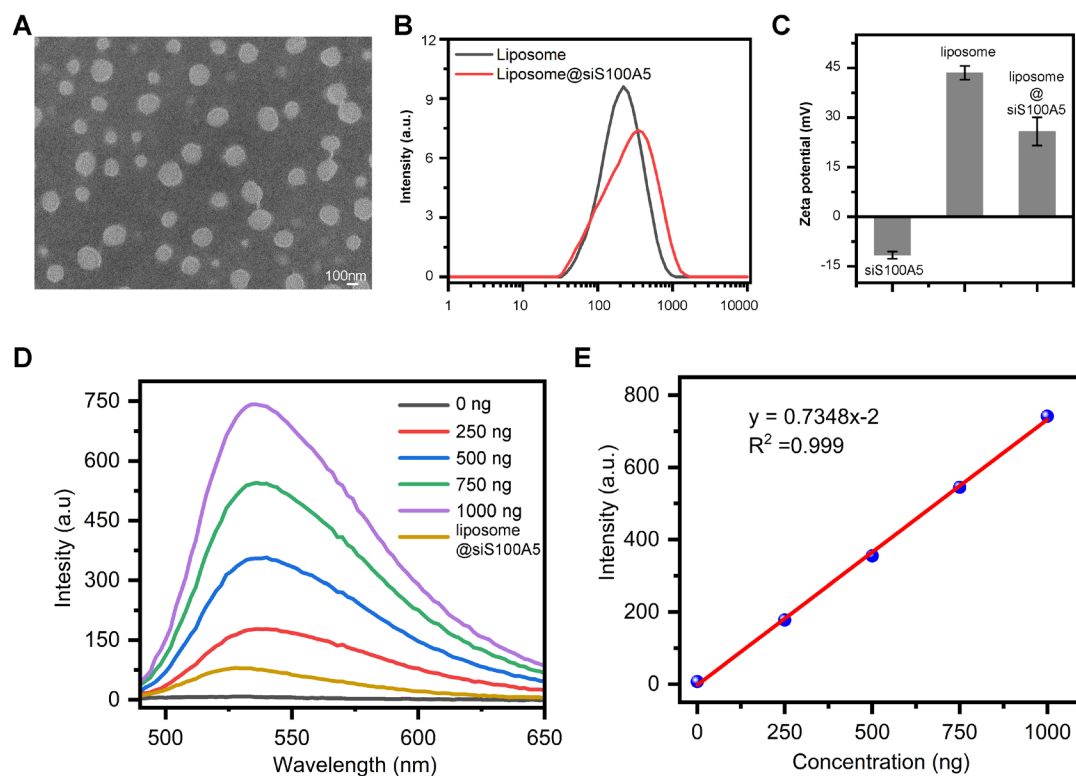

**Figure S24. Successful synthesis and characterization of liposome@siS100A5.** (A) TEM images of liposome@siS100A5. (B) The DLS of the liposome@siS100A5 and liposome. (C) Zeta potential of siS100A5, liposome and liposome@siS100A5. (D-E) Standard curve shows the relationship between fluorescence intensity and siS100A5 concentration.



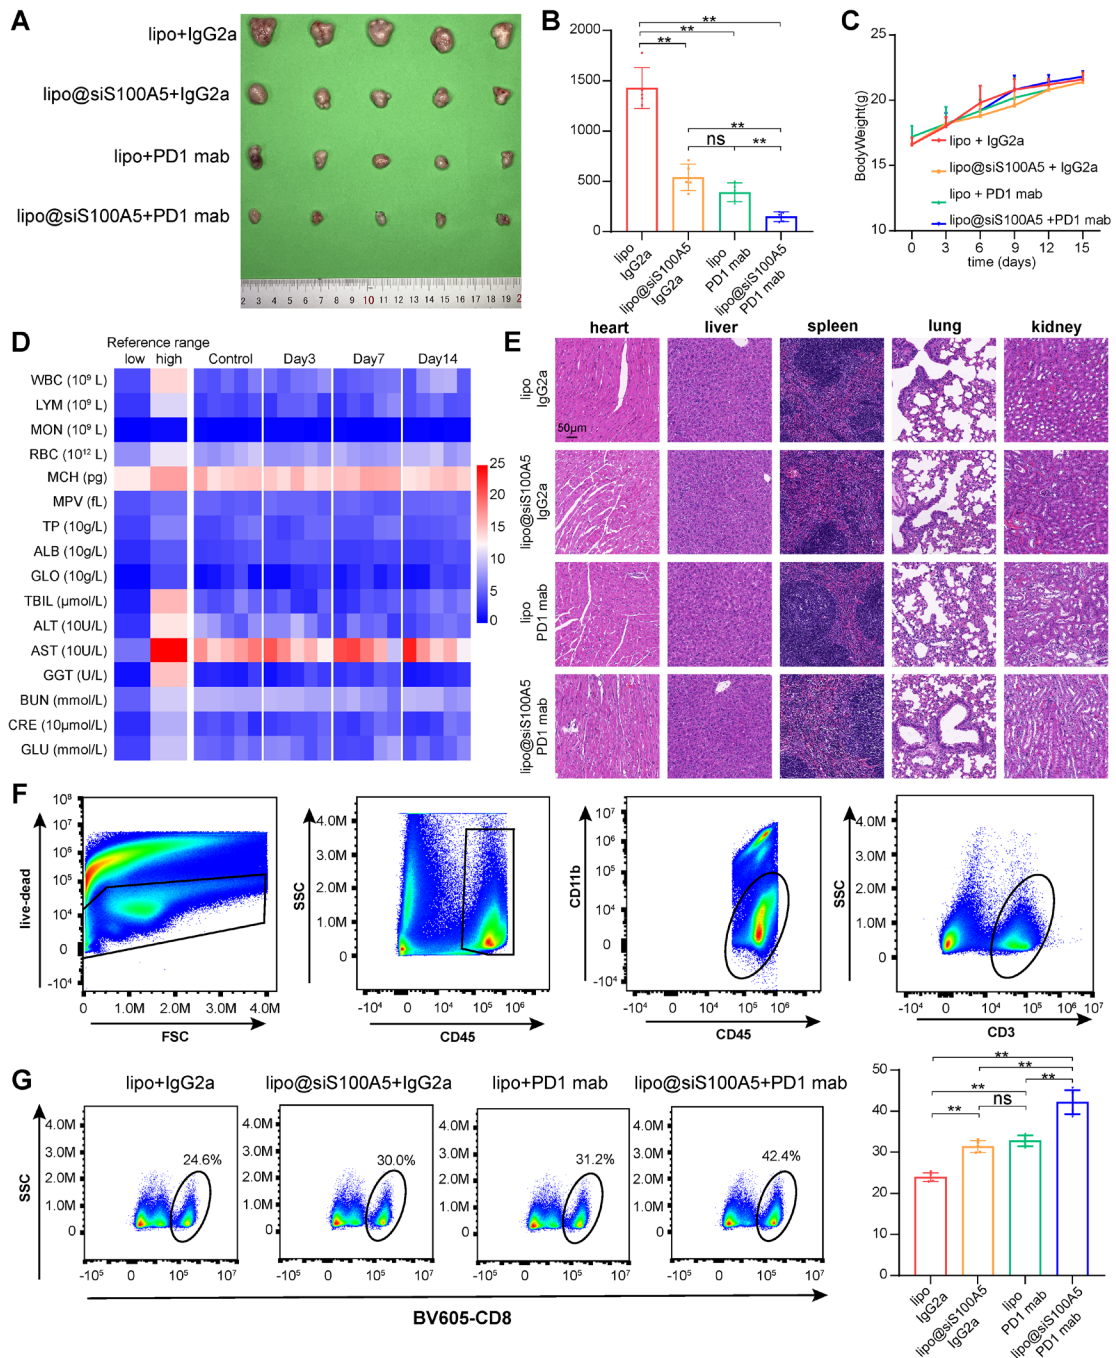

**Figure S25. Targeting S100A5 enhanced the efficacy of anti-PD-1 treatment and CD8<sup>+</sup> T cells recruitment.** (A) Tumor images among different experimental groups after mice sacrifice. (B) Histogram plot of tumor volumes among different experimental groups after mice sacrifice. (C) Scatter diagram plot of body weights among different groups during experimental procedure. (D) Heatmap plot of the mouse whole blood and blood biochemistry indexes. WBC: white blood cell; LYM: lymphocyte; MON: monocyte; RBC: red blood cell; MCH: mean corpuscular hemoglobin; MPV: mean platelet volume; TP: total protein; ALB: albumin; GLO: globulin; TBIL: total bilirubin;

ALT: alanine aminotransferase; AST: aspartate transaminase; GGT:  $\gamma$ -glutamyl transpeptidase; BUN: blood urea nitrogen; CRE: creatinine; GLU: glucose. (E) H&E staining of heart, liver, spleen, lung, and kidney among different experimental groups. (F) Gate strategy of flow cytometry analysis. (G) Representative contour plots and the proportion of CD8<sup>+</sup> T cells in T cells. ns, not statistically significant; \*\* $P < 0.01$ .

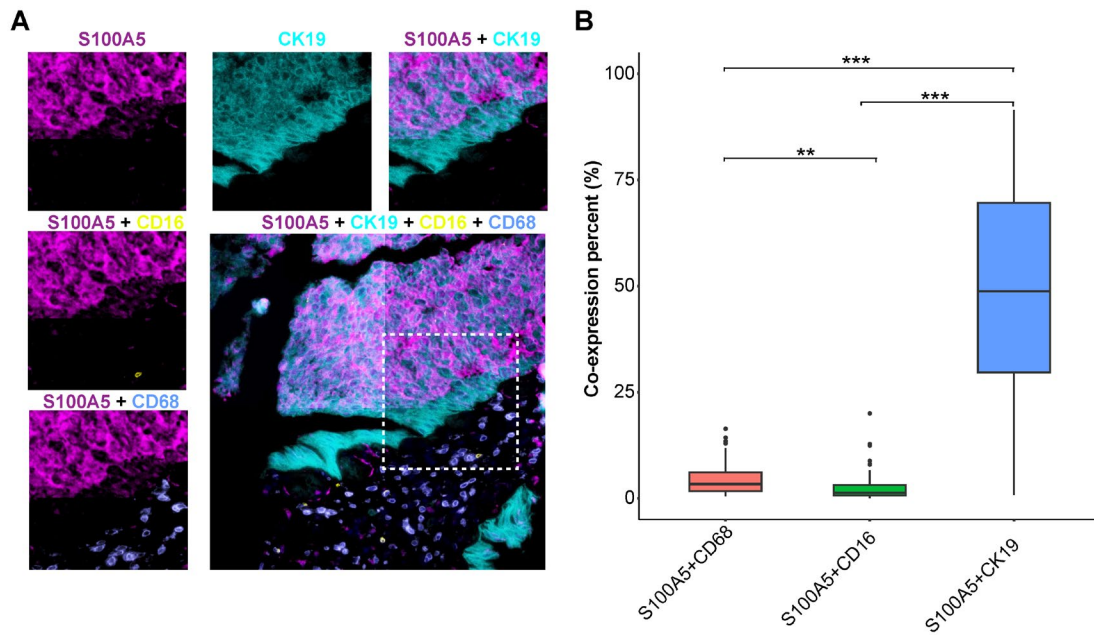

**Figure S26.** (A) Co-expression of S100A5 on malignant cell, NK cell and macrophage: S100A5 (purple), CK19 (azure), CD16 (yellow), CD68 (light blue). (B) The histograms of different S100A5<sup>+</sup>CD68<sup>+</sup>, S100A5<sup>+</sup>CD16<sup>+</sup> and S100A5<sup>+</sup>CK19<sup>+</sup> percent cells among the whole TMA.
